# 2023 American Society of Anesthesiologists Practice Guidelines for Preoperative Fasting: Carbohydrate-containing Clear Liquids with or without Protein, Chewing Gum, and Pediatric Fasting Duration—A Modular Update of the 2017 American Society of Anesthesiologists Practice Guidelines for Preoperative Fasting\*

Girish P. Joshi, M.B.B.S., M.D. (Co-Chair),  
Basem B. Abdelmalak, M.D. (Co-Chair),  
Wade A. Weigel, M.D., Monica W. Harbell, M.D.,  
Catherine I. Kuo, M.D., Sulpicio G. Soriano, M.D.,  
Paul A. Stricker, M.D.,  
Tommie Tipton, B.S.N., R.N., C.N.O.R.,  
Mark D. Grant, M.D., Ph.D., Anne M. Marbella, M.S.,  
Madhulika Agarkar, M.P.H., Jaime F. Blanck, M.L.I.S., M.P.A.,  
Karen B. Domino, M.D., M.P.H.

*ANESTHESIOLOGY* 2023; 138:132–51

Practice guidelines are systematically developed recommendations that assist the practitioner and patient in making decisions about health care. These recommendations may be

## ABSTRACT

These practice guidelines are a modular update of the "Practice guidelines for preoperative fasting and the use of pharmacologic agents to reduce the risk of pulmonary aspiration: Application to healthy patients undergoing elective procedures." The guidance focuses on topics not addressed in the previous guideline: ingestion of carbohydrate-containing clear liquids with or without protein, chewing gum, and pediatric fasting duration.

(*ANESTHESIOLOGY* 2023; 138:132–51)

## HIGHLIGHTS BOX

- The task force reaffirms the previous recommendations for clear liquids until 2 h preoperatively. Simple or complex carbohydrate-containing clear liquids appear to reduce hunger compared with noncaloric clear liquids. The addition of protein to preoperative carbohydrate-containing clear liquids did not seem to either benefit or harm healthy patients. We further suggest not to delay surgery in healthy adults after confirming the removal of chewing gum.
- Fasting duration is often substantially longer than recommended and prolonged fasting has well described adverse consequences. Therefore, to avoid prolonged fasting in children, efforts should be made to allow clear liquids in healthy children as close to 2 h before procedures as possible.
- The task force recommends a robust local effort at each facility disseminating and discussing information shared in this document, providing necessary education to all patient care teams, including but not limited to all members of the anesthesiology and surgical teams, preoperative clinic personnel, preoperative nurses, and hospital floor nurses. Furthermore, it would be necessary to update related policies, printed literature, and wall posters/charts to ensure that patients are receiving consistent messages and instructions from all medical personnel.

adopted, modified, or rejected according to clinical needs and constraints and are not intended to replace local institutional policies. In addition, practice guidelines developed by the American Society of Anesthesiologists (ASA) are not intended as standards or absolute requirements, and their use cannot guarantee any specific outcome. Practice guidelines are subject to revision as warranted by the evolution of medical knowledge, technology, and practice. They provide basic recommendations for anesthesia care that are supported by synthesis and analysis of the current literature, expert and practitioner opinion, public comment, and clinical feasibility data. Practice guidelines aim to improve patient care and patient outcomes by providing up-to-date information for patient care.

This article is featured in "This Month in Anesthesiology," page A1. Supplemental Digital Content is available for this article. Direct URL citations appear in the printed text and are available in both the HTML and PDF versions of this article. Links to the digital files are provided in the HTML text of this article on the Journal's Web site ([www.anesthesiology.org](http://www.anesthesiology.org)).

Received from the American Society of Anesthesiologists, Schaumburg, Illinois. Submitted for publication May 18, 2022. Accepted for publication August 30, 2022. Supported by the American Society of Anesthesiologists and developed under the direction of the Committee on Practice Parameters, Karen B. Domino, M.D., M.P.H. (Chair).

\*Updated by the American Society of Anesthesiologists Task Force on Preoperative Fasting.

Girish P. Joshi, M.B.B.S., M.D., Dallas, Texas; Basem B. Abdelmalak, M.D., Cleveland, Ohio; Wade A. Weigel, M.D., Seattle, Washington; Monica W. Harbell, M.D., Phoenix, Arizona; Catherine I. Kuo, M.D., Downer's Grove, Illinois; Sulpicio G. Soriano, M.D., Boston, Massachusetts; Paul A. Stricker, M.D., Philadelphia, Pennsylvania; Tommie Tipton, B.S.N., R.N., C.N.O.R., Dallas, Texas; Mark D. Grant, M.D., Ph.D., Schaumburg, Illinois; Anne M. Marbella, M.S., Schaumburg, Illinois; Madhulika Agarkar, M.P.H., Schaumburg, Illinois; Jaime Friel Blanck, M.L.I.S., M.P.A., Baltimore, Maryland; Karen B. Domino, M.D., M.P.H., Seattle, Washington.

Copyright © 2023, the American Society of Anesthesiologists. All Rights Reserved. *Anesthesiology* 2023; 138:132–51. DOI: 10.1097/ALN.0000000000004381

The intended population for this update is the same as for the 2017 ASA guideline, limited to healthy patients undergoing elective procedures.<sup>1</sup> Healthy patients are those without coexisting diseases or conditions that may increase the risk for aspiration, including esophageal disorders such as significant uncontrolled reflux disease, hiatal hernia, Zenker's diverticulum, achalasia, stricture; previous gastric surgery (for example, gastric bypass); gastroparesis; diabetes mellitus; opioid use; gastrointestinal obstruction or acute intraabdominal processes; pregnancy; obesity; and emergency procedures.<sup>2-4</sup> Anesthesiologists should recognize that these conditions can increase the likelihood of regurgitation and pulmonary aspiration and should modify these guidelines based upon clinical judgment.

## Recommendations

| Recommendation                                                                                                                                                                                                                                                    | Strength of Recommendation | Strength of Evidence |
|-------------------------------------------------------------------------------------------------------------------------------------------------------------------------------------------------------------------------------------------------------------------|----------------------------|----------------------|
| 1. We recommend healthy adults* drink carbohydrate-containing clear liquids† until 2 h before elective procedures requiring general anesthesia, regional anesthesia, or procedural sedation. The carbohydrates may be simple or complex.                          | Strong                     | Moderate             |
| 2. There is insufficient evidence to recommend protein-containing clear liquids preferentially over other clear liquids before elective procedures requiring general anesthesia, regional anesthesia, or procedural sedation (no recommendation).                 | Not applicable             | Very low             |
| 3. We suggest not delaying elective procedures requiring general anesthesia, regional anesthesia, or procedural sedation in healthy adults* who are chewing gum.‡                                                                                                 | Conditional                | Very low             |
| 4. There is insufficient evidence concerning benefits and harms to recommend pediatric patients drink clear liquids until 1 h <i>versus</i> 2 h before procedures with general anesthesia, regional anesthesia, or procedural sedation (no recommendation).       | Not applicable             | Very low             |
| 5. To avoid prolonged fasting in children, efforts should be made to allow clear liquids in children at low risk of aspiration as close to 2 h before procedures as possible. In children with shorter clear liquid fasting duration, exercise clinical judgment. | Best practice statement    | Not applicable       |

\*Individuals without coexisting diseases or conditions that may increase the risk for aspiration, including esophageal disorders such as significant uncontrolled reflux disease, hiatal hernia, Zenker's diverticulum, achalasia, stricture, previous gastric surgery (for example, gastric bypass), gastroparesis, diabetes mellitus, opioid use, gastrointestinal obstruction or acute intraabdominal processes, pregnancy, obesity, and emergency procedures. Exercise clinical judgment with this patient population. †Up to 400 mL of clear liquids is considered an appropriate volume. Trial participants ingested a median of 400 mL of carbohydrate-containing clear liquids (interquartile range, 300 to 400 mL) up to 2 h before anesthesia administration. ‡Chewing gum should be removed before any sedative/anesthetic is administered.

## Purpose

This is a modular update of the “Practice guidelines for preoperative fasting and the use of pharmacologic agents to reduce the risk of pulmonary aspiration: Application to healthy patients undergoing elective procedures. An updated report by the ASA task force on preoperative fasting and use of pharmacologic agents to reduce the risk of pulmonary aspiration,” which was adopted by the ASA in 2016 and published in 2017.<sup>1</sup> The 2017 guideline did not address whether one type of clear liquid, such as water or carbohydrate-containing clear liquids (with and without protein), is more beneficial. The 2017 guideline also did not address chewing gum or whether a shorter duration of fasting from clear liquids would be more beneficial than the current recommendation of 2 h of fasting for pediatric patients. The purpose of this modular update is to evaluate the current evidence on preoperative fasting, focusing on these interventions. All other recommendations from the 2017 guideline still apply. The outcomes of interest for this update include the adverse consequences of fasting (hunger, thirst, and preoperative nausea and vomiting) and pulmonary aspiration.

## Background

Pulmonary aspiration of gastric contents is a rare but potentially life-threatening complication. Although aspiration is uncommon in healthy ASA Physical Status I or II patients (estimated 1.1/10,000 adults and 1.3/10,000 children),<sup>2-4</sup> it may lead to pneumonitis, pneumonia, and airway obstruction.<sup>5,6</sup> Of the aspiration events described in the 2021 ASA Closed Claims analysis of aspiration of gastric contents events, 57% of aspiration incidents resulted in death, and another 15% resulted in permanent severe injury.<sup>4</sup> The rationale for preoperative fasting is to minimize gastric content, thereby lowering the risk of regurgitation and subsequent pulmonary aspiration.

Although the relationship between gastric volume and gastric emptying time with aspiration risk has not been demonstrated in adequately powered studies,<sup>7</sup> most published studies have used these measures as intermediate outcomes. Assuming a 1.1/10,000 baseline incidence of aspiration, to detect a 2-fold increase would require 214,000 participants per arm in a two-arm study (power, 80%;  $\alpha$ , 0.05).

Previous ASA guidelines recommend that clear liquids such as water, black coffee, black tea, and juice without pulp are safe to drink until 2 h before general anesthesia, regional anesthesia, or procedural sedation for elective procedures.<sup>1</sup>

For patients undergoing elective procedures, this update addresses:

- Carbohydrate-containing clear liquids (simple or complex)
- Protein-containing clear liquids

- Chewing gum
- Clear liquid fasting duration (1 h *vs.* 2 h) for children

## Methodology

The guideline task force included anesthesiologists, epidemiology-trained methodologists, and a patient representative, who was chosen from contacts of the task force and who had experience as a patient. The members disclosed relevant relationships (industry and other entities) that might pose a conflict of interest. The task force was responsible for developing key questions; the relevant patient populations, interventions, comparators, and outcomes; and the study inclusion/exclusion criteria to guide the systematic review (see Systematic Review Protocol in the Supplemental Digital Content, <http://links.lww.com/ALN/C930>).

- Population: patients undergoing general anesthesia, regional anesthesia, or procedural sedation for elective procedures
- Interventions: drinking carbohydrate-containing clear liquids (simple or complex) until 2 h before general anesthesia, regional anesthesia, or procedural sedation for elective procedures; drinking protein-containing clear liquids (all studied included carbohydrates) until 2 h before general anesthesia, regional anesthesia, or procedural sedation for elective procedures; gum chewing before surgery/procedure; and a shortened duration for clear liquid fasting in children of 1 h
- Comparators: fasting or drinking noncaloric clear liquids (e.g., water, placebo, broth, black tea, black coffee); no gum chewing; and clear liquid fasting duration of 2 h in pediatric patients
- Outcomes: adverse effects of fasting (preoperative hunger, thirst, and nausea) and pulmonary aspiration. Due to the rarity of aspiration, regurgitation, gastric volume, and gastric pH were included as intermediate outcomes.

The anesthesiologist and patient representative task force members rated the importance of each outcome for decision-making on a scale of 1 to 9 (1 to 3, of limited importance; 4 to 6, important; 7 to 9, critical).<sup>8</sup> The evidence synthesis focused on the outcomes rated important or critical.

## Literature Search

Comprehensive bibliographic database searches were conducted by a medical librarian using PubMed, EMBASE, and SCOPUS in July 2020 and updated in December 2021. Studies examining carbohydrate- and protein-containing clear liquids published in January 2000 or later were eligible for inclusion. Because gum chewing and 1-h fasting in pediatric patients were new in this guideline, studies published beginning in January 1990 were eligible. In addition, the Cochrane Central Register of Controlled Trials was queried; task force members provided potentially relevant studies; references from systematic reviews and meta-analyses

were hand-searched; and trial registries were searched. The PRISMA flow diagram (<http://links.lww.com/ALN/C931>) and Literature Search Strategy (<http://links.lww.com/ALN/C932>) are available as Supplemental Digital Content.

## Study Screening and Selection

Titles with abstracts and full-text screening were performed using systematic review software (DistillerSR,<sup>9</sup> Evidence Partners, Ottawa, Canada). Screening was performed independently by two methodologists. Conflicts were discussed and, when necessary, included a third methodologist to achieve consensus. All discrepancies were resolved. Potential inclusion-exclusion discrepancies were also examined with an artificial intelligence tool, a component of the systematic review software. Eligible studies included randomized and nonrandomized trials, quasiexperimental, cohort (prospective and retrospective), and case-control designs. Case reports and case series, conference abstracts, letters not considered research reports, non-English publications, and animal studies were excluded. Excluded studies with reasoning are shown in the Supplemental Digital Content (<http://links.lww.com/ALN/C933>). Studies with multi-component interventions (for example, enhanced recovery after surgery protocols) were excluded if the effect of fasting on outcomes could not be independently ascertained. Clear liquids with carbohydrates were categorized as simple or complex. Simple carbohydrates included clear fruit juices or water with glucose or fructose added. The complex carbohydrate used in the carbohydrate-loading interventions was maltodextrin. Clear liquids containing less than 10 gm/ml carbohydrate were not considered carbohydrate-containing. Oral rehydration solutions were classified as simple carbohydrates. All protein-containing clear liquids also contained carbohydrates. Trial comparator liquids such as water, placebo, broth, black tea, and black coffee are referred to as “noncaloric clear liquids.”

## Data Extraction and Management

The study results were extracted into DistillerSR by a single methodologist and reviewed by a second methodologist for quality control. Conflicts were resolved by consensus. When the relevant data were not reported in the published work, attempts were made to contact the authors. The figures were digitized as necessary to obtain quantitative results for synthesis.

## Evidence Synthesis

The body of evidence was first described according to study characteristics and treatment arms. The results were then summarized in tabular form by outcome. When relevant, decision-informative, and practicable, pairwise and network random-effects meta-analyses of randomized controlled trials were conducted.<sup>10,11</sup> Nonrandomized studies were considered in the assessment of harms when there was infrequent reporting of harms in randomized controlled trials. Small study

**Table 1.** GRADE Strength of Evidence Definitions

| GRADE    | Interpretation                                                                                                                                                                          |
|----------|-----------------------------------------------------------------------------------------------------------------------------------------------------------------------------------------|
| High     | We are very confident that the true effect lies close to the estimate of the effect.                                                                                                    |
| Moderate | We are moderately confident in the effect estimate. The true effect is likely to be close to the estimate of the effect, but there is a possibility that it is substantially different. |
| Low      | Our confidence in the effect estimate is limited. The true effect may be substantially different from the estimate of the effect.                                                       |
| Very low | We have very little confidence in the effect estimate. The true effect is likely to be substantially different from the estimate of effect.                                             |

GRADE, Grading of Recommendations, Assessment, Development, and Evaluation framework.

effects and the potential for publication bias were evaluated using funnel plots and regression-based tests.<sup>12</sup> Analyses were conducted in R (R Foundation for Statistical Computing, Vienna, Austria).<sup>13–15</sup> (See the methods supplement for further details, <http://links.lww.com/ALN/C962>.)

### Risk of Bias Assessment

The risk of bias for individual studies was evaluated using tools according to study design: for randomized controlled trials, the Cochrane risk of bias tool,<sup>16</sup> and for nonrandomized studies, the Risk Of Bias In Non-Randomised Studies of Interventions tool.<sup>17</sup> The risk of bias appraisals for only randomized controlled trials were used to support all strength-of-evidence ratings (supplemental figs. 1 through 14, <http://links.lww.com/ALN/C935>).

### Strength of Evidence

The strength of evidence was rated by outcome using the Grading of Recommendations, Assessment, Development, and Evaluation framework (table 1). In this framework, randomized control trials start as high strength of evidence, and nonrandomized studies start as low. The strength may be downgraded based on summary study-level risk of bias, inconsistency, indirectness, imprecision, and publication bias. The strength may be upgraded if the effect is large, if a dose-response is present, or if unaccounted residual confounding would likely have increased the effect.<sup>18</sup> For the comparisons of simple and complex carbohydrate-containing clear liquids (residual gastric volume and hunger, and thirst), the strength of evidence was assessed with the Confidence in Network Meta-Analysis tool.<sup>19</sup> This tool includes considerations specific to network meta-analyses.

### Strength of Recommendations

For each key question, the evidence synthesis and summary tables of benefits and harms were presented to the task force. The methodologists also reviewed the strength

of the evidence for each outcome by key question with the task force.

The categories of recommendations in the Grading of Recommendations, Assessment, Development, and Evaluation approach include strong in favor, conditional in favor, conditional against, and strong against an intervention. Strong recommendations reflect the task force believing all or almost all clinicians would choose the specific action or approach. Conditional recommendations are those where most, but not all, would choose the action or approach.<sup>20,21</sup> When the task force judged the body of evidence inappropriate to rate the strength of evidence but judged a recommendation important, a best practice statement was considered.<sup>22</sup>

## Carbohydrate-containing Clear Liquids

### Key Question

For adults undergoing elective procedures with general anesthesia, regional anesthesia, or procedural sedation, what are the benefits and harms of carbohydrate-containing clear liquids ingested until 2 h before the procedure compared with fasting and noncaloric clear liquids?

### Recommendation

We recommend healthy adults drink carbohydrate-containing clear liquids until 2 h before elective procedures requiring general anesthesia, regional anesthesia, or procedural sedation. The carbohydrates may be simple or complex.

- Strength of recommendation: Strong
- Strength of evidence: Moderate

Up to 400 ml of clear liquids is considered an appropriate volume. Trial participants ingested a median of 400 ml of carbohydrate-containing clear liquids (interquartile range, 300 to 400 ml) up to 2 h before anesthesia administration.

### Summary of Evidence

Most patients in the studies were ASA Physical Status I or II with mean or median body mass index of 25 kg/m<sup>2</sup> (range, 21 to 33 kg/m<sup>2</sup>; see Appendix). Patients drinking carbohydrate-containing clear liquids until 2 h before their procedures experienced less hunger and thirst compared to fasting (table 2) and less hunger compared to drinking noncaloric clear liquids (table 3). There was no incidence of aspiration or regurgitation in any groups. Tables 2 and 3 summarize the evidence for clinically important outcomes. Supplemental tables 1 to 4 (<http://links.lww.com/ALN/C934>) detail the strength-of-evidence ratings.

### Carbohydrate-containing Clear Liquids *versus* Fasting

**Patient-reported Outcomes.** Participants drinking carbohydrate-containing clear liquids had lower patient-rated hunger



**Table 2.** Benefits, Harms, and Strength of Evidence for Carbohydrate-containing Clear Liquids *versus* Fasting

| Nonrandomized Studies | Randomized Controlled Trials | Patients | Outcomes                   | Strength of Evidence GRADE | Effect                       | Estimate (95% CI)                     |
|-----------------------|------------------------------|----------|----------------------------|----------------------------|------------------------------|---------------------------------------|
| 3                     | 5                            | 496      | Less hunger*               | Moderate                   | Risk ratio                   | 0.55 (0.43 to 0.71)                   |
|                       | 19                           | 1,439    | Lower patient-rated hunger | Moderate                   | Standardized mean difference | -0.62 (-0.84 to -0.40)                |
|                       |                              |          |                            |                            | Mean difference†             | -16.7 (-22.6 to -10.9)                |
|                       | 6                            | 673      | Less thirst*               | Moderate                   | Risk ratio                   | 0.43 (0.24 to 0.74)                   |
|                       | 19                           | 1,437    | Lower patient-rated thirst | Moderate                   | Standardized mean difference | -1.0 (-1.4 to -0.63)                  |
|                       |                              |          |                            |                            | Mean difference†             | -24.0 (-33.0 to -15.0)                |
|                       | 5                            | 290      | Less nausea*               | Low                        | Risk ratio                   | 0.76 (0.40 to 1.44)                   |
|                       | 8                            | 659      | Lower patient-rated nausea | Low                        | Standardized mean difference | -0.03 (-0.48 to 0.43)                 |
|                       |                              |          |                            |                            | Mean difference†             | -0.2 (-4.0 to 3.5)                    |
|                       | 2                            | 108      | More satisfaction          | Low                        |                              | Discordant trial results              |
|                       | 31                           | 2,688    | Aspiration                 | Not rated                  |                              | No aspiration reported                |
|                       | 5                            | 402      | Regurgitation              | Very low                   |                              | Differences not detected in any trial |
|                       | 5                            | 518      | Vomiting                   | Low                        |                              | Differences not detected in any trial |

\*Incidence proportion. †Reexpressed from standardized mean difference based on mean weighted standard deviation from studies reporting results on a 0 to 100 visual analogue scale. ‡Mean pH in fasted arms 3.1 (95% CI, 1.4 to 4.7). Patients with long-term use of histamine 2 receptor antagonists were excluded from the studies, although one study administered histamine 2 receptor antagonists to the patients in both arms of the study the night before surgery.

GRADE, Grading of Recommendations, Assessment, Development, and Evaluation framework.

**Table 3.** Benefits, Harms, and Strength of Evidence for Carbohydrate-containing Clear Liquids *versus* Noncaloric Clear Liquids

| Nonrandomized Studies | Randomized Controlled Trials | Patients | Outcomes                   | Strength of Evidence GRADE | Effect                       | Estimate (95% CI)                     |
|-----------------------|------------------------------|----------|----------------------------|----------------------------|------------------------------|---------------------------------------|
| 1                     | 9                            | 939      | Lower patient-rated hunger | Moderate                   | Standardized mean difference | -0.52 (-0.83 to -0.21)                |
|                       |                              |          |                            |                            | Mean difference†             | -12.8 (-20.9 to -5.2)                 |
|                       | 1                            | 40       | Less thirst*               | Very low                   | Risk ratio                   | 0.14 (0.01 to 2.6)                    |
|                       | 10                           | 850      | Lower patient-rated thirst | Low                        | Standardized mean difference | -0.3 (-0.73 to 0.13)                  |
|                       |                              |          |                            |                            | Mean difference†             | -5.6 (-13.4 to 2.3)                   |
|                       | 4                            | 823      | Less nausea*               | Very low                   |                              | Discordant trial results              |
|                       | 4                            | 338      | Lower patient-rated nausea | Low                        |                              | Differences not detected in any trial |
|                       | 2                            | 132      | More satisfaction          | Low                        |                              | Higher with carbohydrate liquids      |
|                       | 17                           | 1,823    | Aspiration                 | Not Rated                  |                              | No aspiration reported                |
|                       | 3                            | 115      | Regurgitation              | Not Rated                  |                              | No regurgitation reported             |
|                       | 4                            | 823      | Vomiting                   | Very low                   |                              | Differences not detected in any trial |
|                       | 6                            | 955      | Residual gastric volume    | Low                        | Mean difference              | 0.1 mL (-3.8 to 4.0)                  |
|                       | 1                            | 105      | Gastric pH                 | Very low                   |                              | Differences not detected in any trial |

\*Incidence proportion. †Reexpressed from standardized mean difference based on mean weighted standard deviation from studies reporting results on a 0 to 100 visual analogue scale.

GRADE, Grading of Recommendations, Assessment, Development, and Evaluation framework.

(supplemental figs. 15 to 16, <http://links.lww.com/ALN/C935>) and thirst<sup>23–42</sup> compared with fasting patients (moderate strength of evidence). Differences were not detected in rates of nausea<sup>36,39,43–45</sup> (low strength of evidence) or patient-rated nausea (low strength of evidence). Patient satisfaction<sup>31,46</sup> was reported in only two trials, and a difference could not be assessed (low strength of evidence).

**Clinical Outcomes.** No aspiration was reported after either the fasting or carbohydrate-containing clear liquids groups in 31 randomized controlled trials,<sup>23–26,29,30,32,33,36,37,39,42–44,47–64</sup> 2 non-randomized trials,<sup>65,66</sup> and 1 case-control study<sup>67</sup> (strength of evidence not rated due to lack of events). Differences were not detected in regurgitation<sup>43,49,55,66,68,69</sup> (very low strength of evidence) or preoperative vomiting<sup>39,50–52,62</sup> (low strength of evidence). Meaningful differences were not apparent for either residual gastric volume<sup>34,38,41,44,46,48–51,62,68–71</sup> (supplemental fig. 17, <http://links.lww.com/ALN/C935>) or gastric pH<sup>46,50,51,69,71</sup> after fasting or drinking carbohydrate-containing clear liquids (moderate strength of evidence).

### Carbohydrate-containing Clear Liquids *versus* Noncaloric Clear Liquids

**Patient-reported Outcomes.** Drinking carbohydrate-containing clear liquids resulted in lower hunger ratings than did noncaloric clear liquids (moderate strength of evidence).<sup>23,24,26,39,41,72–75</sup> Differences were not evident for patient ratings of thirst<sup>23,24,26,39,41,72,73,75–77</sup> (low strength of evidence) and nausea<sup>23,24,26,73</sup> (low strength of evidence) or in rates of preoperative thirst<sup>78</sup> and nausea<sup>23,24,26,39,73,79</sup> (both very low strength of evidence). Patient satisfaction<sup>46,80</sup> was reported in two trials, with higher satisfaction in patients drinking carbohydrate-containing clear liquids (low strength of evidence).

**Clinical Outcomes.** No aspiration after carbohydrate-containing clear or noncaloric clear liquids was reported in 17 randomized controlled trials.<sup>23,24,26,39,55,57,59,63,74,75,77,78,80–84</sup> (strength of evidence not rated due to lack of events). Regurgitation<sup>49,55,77</sup> or preoperative vomiting<sup>39,75,82,85</sup> did not differ in randomized controlled trials (very low strength of evidence). Differences in either residual gastric volume<sup>41,46,68,77,82,86</sup> (low strength of evidence) or gastric pH<sup>46,87</sup> (very low strength of evidence) could not be determined.

### Comment

Healthy adult patients should be encouraged to drink up to 400 ml of carbohydrate-containing clear liquids until 2 h before an elective procedure to minimize potential harms of prolonged fasting, including hunger and thirst. Trials provided participants with a median of 400 ml (interquartile range, 300 to 400 ml) of clear liquids 2 h before anesthesia administration without adverse consequences. Although differences were not detected in thirst, preoperative nausea, or patient satisfaction, the body of evidence is consistent with lower patient ratings of hunger with carbohydrate-containing

clear liquids over noncaloric ones. Aspiration of gastric contents was not evident in the studies.

The overall assessment of aspiration risk may not rely on ASA Physical Status alone, as many of the comorbidities that qualify patients for a higher ASA Physical Status score may be unrelated to delayed gastric emptying or aspiration risk (for example, poorly controlled hypertension). Important consideration should be given to comorbidities that may affect gastric emptying and/or aspiration risk, regardless of ASA Physical Status. Decision-making is complicated by emerging data suggesting that some of the conditions traditionally considered to have an impact on gastric emptying may have little or no effect on gastric emptying. Consistent with the 2017 ASA guideline intended population,<sup>1</sup> healthy individuals are defined as those without coexisting diseases or conditions that may increase the risk for aspiration, including esophageal disorders such as significant uncontrolled reflux disease, hiatal hernia, Zenker's diverticulum, achalasia, stricture; previous gastric surgery (for example, gastric bypass); gastroparesis; diabetes mellitus<sup>88,89</sup>; opioid use; gastrointestinal obstruction or acute intraabdominal processes; pregnancy; obesity; and emergency procedures.<sup>2–4</sup> Anesthesiologists should recognize that these conditions can increase the likelihood of regurgitation and pulmonary aspiration and should modify these guidelines based upon their clinical judgment.

Mixed treatment comparisons did not support the superiority of complex carbohydrates over simple carbohydrates with respect to residual gastric volume or hunger (network meta-analysis; supplemental figs. 18 to 20, <http://links.lww.com/ALN/C935>, and supplemental tables 5 and 6, <http://links.lww.com/ALN/C934>).

Carbohydrate-containing liquids may have an impact on blood glucose levels in patients with diabetes, especially patients who skip or reduce their usual hypoglycemics before surgery. Home glucometer readings may help guide the patient's choice of a carbohydrate or a noncaloric clear liquid.

In summary, the evidence showed that for patients with low risk of aspiration, carbohydrate-containing clear liquids until 2 h preoperatively was superior to absolute fasting with respect to beneficial outcomes, without evidence of increased risks. Both simple and complex carbohydrate-containing clear liquids were slightly more advantageous compared with noncaloric clear liquids in patient satisfaction.

### Protein-containing Clear Liquids

#### Key Question

For adults undergoing elective procedures with general anesthesia, regional anesthesia, or procedural sedation, what are the benefits and harms of protein-containing clear liquids 2 h before the procedure compared with fasting and other clear liquids?

#### Recommendation

There is insufficient evidence to recommend protein-containing clear liquids preferentially over other clear liquids 2 h

**Table 4.** Benefits, Harms, and Strength of Evidence for Protein-containing Clear Liquids *versus* Fasting

| Nonrandomized Studies | Randomized Controlled Trials | Patients | Outcomes                   | Strength of Evidence GRADE | Effect          | Estimate (95% CI)        |
|-----------------------|------------------------------|----------|----------------------------|----------------------------|-----------------|--------------------------|
|                       | 1                            | 98       | Less hunger*               | Very low                   | Risk ratio      | 0.66 (0.46 to 0.96)      |
|                       | 1                            | 113      | Lower patient-rated hunger | Very low                   |                 | Median 10 vs. 18†, NS    |
|                       | 1                            | 98       | Less thirst*               | Very low                   | Risk ratio      | 0.85 (0.57 to 1.76)      |
|                       | 1                            | 113      | Lower patient-rated thirst | Very low                   |                 | Median 22 vs. 40†, NS    |
|                       | 1                            | 98       | Less nausea*               | Very low                   | Risk ratio      | 1.15 (0.38 to 3.53)      |
|                       | 1                            | 113      | Less patient-rated nausea  | Very low                   |                 | Median 0 vs. 0†, NS      |
| No studies            | No studies                   |          | Greater satisfaction       |                            |                 |                          |
| 1                     | 8                            | 629      | Aspiration                 | Not Rated                  |                 | No aspiration reported   |
|                       | 4                            | 150      | Regurgitation              | Very low                   |                 | Differences not detected |
|                       | 1                            | 22       | Vomiting                   | Very low                   |                 | No vomiting reported     |
|                       | 3                            | 68       | Residual gastric volume    | Low                        | Mean difference | -2.5 mL (-8.6 to 3.7)    |
| No studies            | No studies                   |          | Gastric pH                 |                            |                 |                          |

\*Incidence proportion. †0 to 100 visual analogue scale.

GRADE, Grading of Recommendations, Assessment, Development, and Evaluation framework; NS, not significant.

**Table 5.** Benefits, Harms, and Strength of Evidence for Protein-containing Clear Liquids *versus* Noncaloric Clear Liquids

| Nonrandomized Studies | Randomized Controlled Trials | Patients | Outcomes                   | Strength of Evidence GRADE | Effect Estimate                                                                                                     |
|-----------------------|------------------------------|----------|----------------------------|----------------------------|---------------------------------------------------------------------------------------------------------------------|
|                       | 1                            | 24       | Lower patient-rated hunger | Very low                   | Median 13 vs. 43†, $p = 0.001$                                                                                      |
|                       | 2                            | 55       | Lower patient-rated thirst | Low                        | 1 randomized controlled trial median 12 vs. 2†, $p = 0.01$<br>1 randomized controlled trial difference not detected |
|                       | 2                            | 86       | Less nausea*               | Low                        | Differences not detected                                                                                            |
|                       | 1                            | 24       | Less patient-rated nausea  | Very low                   | Difference not detected                                                                                             |
|                       | 1                            | 74       | Greater satisfaction       | Very low                   | Mean 8.7 vs. 6.9†, $p = 0.01$                                                                                       |
|                       | 5                            | 270      | Aspiration                 | Not Rated                  | No aspiration reported                                                                                              |
|                       | 2                            | 34       | Regurgitation              | Very low                   | No regurgitation reported                                                                                           |
|                       | 1                            | 17       | Vomiting                   | Very low                   | No vomiting reported                                                                                                |
| No studies            | No studies                   |          | Residual gastric volume    |                            |                                                                                                                     |
| No studies            | No studies                   |          | Gastric pH                 |                            |                                                                                                                     |

\*Incidence proportion. †0 to 100 visual analogue scale. ‡0 to 10 visual analogue scale.

GRADE, Grading of Recommendations, Assessment, Development, and Evaluation framework.

before elective procedures requiring general anesthesia, regional anesthesia, or procedural sedation (no recommendation).

- Strength of evidence: Very low

### Summary of Evidence

All protein-containing clear liquids also contained carbohydrates. Patients drinking protein-containing clear liquids until 2 h before their procedures experienced less hunger compared to fasting (table 4) and less hunger and thirst compared to drinking other clear liquids (table 5). There was no incidence of aspiration in any group. No differences in the occurrence of regurgitation were detected. Tables 4 and 5 summarize the evidence for clinically important outcomes, and supplemental tables

7 to 10 (<http://links.lww.com/ALN/C934>) detail the strength-of-evidence ratings.

### Protein-containing Clear Liquids *versus* Fasting

**Patient-reported Outcomes.** The evidence comparing fasting with protein-containing clear liquids in adults was limited to single trials for each patient-reported outcome (table 4). Differences were not detected in patient-rated or rates of hunger,<sup>32,43</sup> thirst,<sup>32,43</sup> or preoperative nausea<sup>32,43</sup> (all very low strength of evidence).

**Clinical Outcomes.** Aspiration was not reported in any of the included studies (randomized controlled trials<sup>32,43,49,52–55,64</sup> or nonrandomized designs<sup>90</sup>). Differences in regurgitation<sup>43,49,55,68</sup> or preoperative vomiting<sup>52</sup> were unobserved

in randomized controlled trials (very low strength of evidence). A meta-analysis of three trials found a difference of -2.5 ml (95% CI, -8.6 to 3.7) in residual gastric volume for protein-containing clear liquids *versus* fasting.<sup>49,68,91</sup>

### Protein-containing Liquids *versus* Noncaloric Clear Liquids

**Patient-reported Outcomes.** The evidence in adults comparing noncaloric clear liquids with those containing protein was limited, with one to two studies reporting each outcome of interest (table 5). Single trials reported less hunger<sup>73</sup> and greater satisfaction<sup>80</sup> among patients drinking protein-containing clear liquids compared with patients drinking other clear liquids (very low strength of evidence). Evidence was inconsistent for thirst,<sup>73,76</sup> and differences in nausea<sup>85</sup> were not observed.

**Clinical Outcomes.** Aspiration,<sup>49,53,55,57,80</sup> regurgitation,<sup>55,68</sup> and preoperative vomiting<sup>85</sup> were not reported in any studies comparing protein-containing clear liquids with noncaloric clear liquids.

### Comment

All protein-containing clear liquids in the trials included carbohydrates, precluding assessment of liquids containing only protein. There was inconclusive evidence concerning residual gastric volume in nonsurgical studies that included comparisons of protein-containing clear liquids compared with carbohydrate-containing clear liquids alone (supplemental tables 11 and 12, <http://links.lww.com/ALN/C934>). Therefore, there is insufficient evidence to recommend protein-containing over other carbohydrate-containing or noncaloric clear liquids.

## Chewing Gum

### Key Question

For healthy adults undergoing elective procedures with general anesthesia, regional anesthesia, or procedural

sedation, what are the effects of chewing gum on residual gastric volume, gastric pH, and pulmonary aspiration before anesthesia induction?

### Recommendation

We suggest not delaying elective procedures requiring general anesthesia, regional anesthesia, or procedural sedation in healthy adults who are chewing gum.

- Strength of evidence: Very low

Chewing gum should be removed before any sedative/anesthetic is administered.

### Summary of Evidence

Patients chewing gum had a minimally increased residual gastric volume at anesthesia induction compared with fasting (table 6). A difference was not detected in gastric pH between the groups. Table 6 summarizes the evidence for clinically important outcomes. Supplemental tables 13 and 14 (<http://links.lww.com/ALN/C934>) detail the strength-of-evidence ratings.

**Patient-reported Outcomes.** In adults, evidence comparing fasting with chewing gum was inconsistent with respect to patient-rated hunger<sup>92</sup> or thirst<sup>92,93</sup> (very low strength of evidence). A study of smokers<sup>92</sup> reported less thirst than those chewing gum (very low strength of evidence).

**Clinical Outcomes.** There is no clinically relevant increase in residual gastric volume after chewing gum<sup>92,94–97</sup> (low strength of evidence, supplemental fig. 21, <http://links.lww.com/ALN/C935>, and supplemental table 15, <http://links.lww.com/ALN/C934>). A difference was not detected in gastric pH<sup>92,94–97</sup> (low strength of evidence, supplemental table 16, <http://links.lww.com/ALN/C934>). Aspiration was not reported (strength of evidence not rated due to lack of events). Compared with water, residual gastric volume increased in patients chewing gum (very low strength of evidence) in one crossover study.<sup>98</sup>

**Table 6.** Benefits, Harms, and Strength of Evidence for Chewing Gum *versus* Fasting

| Nonrandomized Studies | Randomized Controlled Trials | Patients | Outcomes                  | Strength of Evidence GRADE | Effect          | Estimate (95% CI)                                 |
|-----------------------|------------------------------|----------|---------------------------|----------------------------|-----------------|---------------------------------------------------|
|                       | 1                            | 104      | Less patient-rated hunger | Very low                   |                 | Differences not detected in smokers or nonsmokers |
|                       | 2                            | 162      | Less patient-rated thirst | Very low                   |                 | Inconsistent results nonsmokers                   |
|                       | 1                            | 44       | Less patient-rated thirst | Very low                   |                 | Less thirst smokers                               |
| No studies            | No studies                   |          | Less nausea               |                            |                 |                                                   |
| No studies            | No studies                   |          | Greater satisfaction      |                            |                 |                                                   |
| No studies            | No studies                   |          | Aspiration                |                            |                 |                                                   |
| No studies            | No studies                   |          | Regurgitation             |                            |                 |                                                   |
| No studies            | No studies                   |          | Vomiting                  |                            |                 |                                                   |
|                       | 5                            | 550      | Residual gastric volume   | Low                        | Mean difference | 7.6 mL (3.0 to 12.2)                              |
|                       | 5                            | 550      | Gastric pH                | Low                        | Mean difference | -0.1 (-0.4 to 0.2)                                |

GRADE, Grading of Recommendations, Assessment, Development, and Evaluation framework.



## Comment

Although the task force does not recommend delaying surgery in healthy adults who have chewed gum during the fasting period, we urge clinicians to confirm the gum has been removed before anesthetic administration. The evidence suggests there is not a clinically meaningful increase in gastric volume after chewing gum. Any benefits of gum chewing are inconsistent and insufficiently studied to encourage gum chewing before surgery.

In conclusion, we do not recommend chewing gum before surgery due to absence of demonstrable benefits. However, if a patient chews gum for personal comfort or preference, we recommend not delaying the scheduled elective procedure, due to inconclusive evidence of harm.

## One-hour Clear Liquid Fasting in Pediatric Patients

### Key Question

For pediatric patients undergoing elective procedures with general anesthesia, regional anesthesia, or procedural sedation, what are the benefits and harms of 1-h *versus* 2-h clear liquid fasting?

### Recommendation

There is insufficient evidence concerning benefits and harms to recommend pediatric patients drink clear liquids until 1 h *versus* 2 h before procedures with general anesthesia, regional anesthesia, or procedural sedation (no recommendation).

- Strength of evidence: Very low

### Best Practice Statement

To avoid prolonged fasting in children, efforts should be made to allow clear liquids in children at low risk of

aspiration as close to 2 h before procedures as possible. In children with shorter clear liquid fasting duration, exercise clinical judgment.

### Summary of Evidence

Differences were not detected in patient-reported hunger or thirst, incidence of aspiration or regurgitation, and gastric pH among pediatric patients fasting for 1 h compared with 2 h (table 7). Inconsistent results were reported for residual gastric volume. Table 7 summarizes the evidence for clinically important outcomes. Supplemental tables 17 through 19 (<http://links.lww.com/ALN/C934>) detail the strength-of-evidence ratings.

**Patient-reported Outcomes.** Evidence concerning patient-reported outcomes comparing 1- to 2-h clear liquid fasting in children was limited to one or two studies per outcome. Differences were not detected in preoperative hunger<sup>99</sup> (very low strength of evidence), preoperative thirst<sup>99,100</sup> (very low strength of evidence), or preoperative nausea<sup>99</sup> (very low strength of evidence). A single randomized controlled trial reported higher satisfaction in parents of children with a 1-h clear liquid fast compared with parents of children with a 2-h clear liquid fast<sup>99</sup> (very low strength of evidence).

**Clinical Outcomes.** Two randomized controlled trials and one large prospective cohort study reported on aspiration and regurgitation.<sup>99–101</sup> One trial reported no aspiration in either group.<sup>99</sup> The other trial included children undergoing surgery for cyanotic congenital heart disease and did not detect a difference in aspiration; however, incidence was high in this population (1.8 and 1.7% in the 1- and 2-h arms respectively).<sup>100</sup> A large prospective cohort study that included subgroups of children fasting less than 1 h (n = 1,709) and 1 to 2 h (n = 2,897) reported higher rates of aspiration and regurgitation in the less than 1-h fasting group (very low strength of evidence) but also noninferiority for regurgitation or pulmonary aspiration (not worse than 1 per 1,000) for a 1- to 2-h clear liquid fast compared with longer times.<sup>101</sup>

**Table 7.** Benefits, Harms, and Strength of Evidence for 1-h *versus* 2-h Clear Liquid Fasting in Children

| Nonrandomized Studies | Randomized Controlled Trials | Patients | Outcomes                           | Strength of Evidence GRADE | Effect     | Estimate (95% CI)                        |
|-----------------------|------------------------------|----------|------------------------------------|----------------------------|------------|------------------------------------------|
|                       | 1                            | 131      | Lower patient-rated hunger         | Very low                   |            | Difference not detected                  |
|                       | 1                            | 131      | Lower patient-rated thirst         | Very low                   |            | Difference not detected                  |
|                       | 1                            | 344      | Less thirst (incidence proportion) | Very low                   | Risk ratio | 0.62 (0.43 to 0.89)                      |
|                       | 1                            | 131      | Less nausea (incidence proportion) | Very low                   | Risk ratio | 0.90 (0.03 to 2.2)                       |
|                       | 1                            | 131      | More parental satisfaction         | Very low                   |            | Better in 1 of 4 domains                 |
|                       | 2                            | 475      | Aspiration                         | Very low                   |            | Differences not detected                 |
| 1                     |                              | 4,606    | Aspiration/regurgitation           | Very low                   |            | Less than 1 h: 0.64% vs. 1 to 2 h: 0.24% |
|                       | 2                            | 475      | Vomiting                           | Low                        |            | Differences not detected                 |
| 6*                    | 2                            | 622      | Residual gastric volume            | Very low                   |            | Inconsistent study results               |
|                       | 1                            | 131      | Gastric pH                         | Very low                   |            | Difference not detected                  |

\*Includes single-arm results from randomized controlled trials.

GRADE, Grading of Recommendations, Assessment, Development, and Evaluation framework.

Differences were not detected in vomiting<sup>99,100</sup> or gastric pH<sup>99</sup> between children fasted 1 h *versus* 2 h (low and very low strength of evidence, respectively). Discordant results for residual gastric volume were reported in two trials<sup>99,100</sup> randomizing patients to 1- and 2-h fasting. Six additional studies provided data on gastric volume over time.<sup>35,102-106</sup> Three of the studies<sup>102-104</sup> were consistent with a return to baseline gastric volume close to 2 h, while three studies<sup>35,105,106</sup> were consistent with a return at 1 h (very low strength of evidence; supplemental table 20, <http://links.lww.com/ALN/C934>).

## Comment

Fasting duration is often substantially longer than recommended irrespective of a 1- or 2-h clear liquid fasting policy.<sup>107-112</sup> Prolonged fasting influences patient-related outcomes (preoperative thirst, hunger, anxiety, nausea and vomiting, pain, and reduced feeling of well-being) and clinical outcomes (dehydration, electrolyte imbalance, and hypotension at induction of general anesthesia).<sup>113,114</sup> Due to low-quality evidence, the task force was unable to make a recommendation for reducing the clear liquid fasting duration to 1 h in the pediatric population. Several pediatric anesthesia practices in the United States now utilize the 1-h fasting duration for clear liquids. Recent European<sup>115</sup> and Canadian<sup>116</sup> guidelines have recommended reducing clear liquid fasting to 1 h in children. However, studies in children are limited, lack significant power to detect uncommon risks, and clinical controversy exists.<sup>117</sup>

## Research Gaps and Major Uncertainties

There is a need for well designed, adequately powered randomized trials or large prospective cohort studies in both adults and children to evaluate uncommon adverse events and patient-reported outcomes including preoperative thirst, hunger, anxiety, and patient satisfaction. Comparisons and questions of interest include

- Carbohydrate-containing clear liquids (simple and complex) compared with fasting and noncaloric clear liquids
- Simple carbohydrate-containing clear liquids compared with complex carbohydrate-containing clear liquids
- Carbohydrate-containing clear liquids (simple and complex) compared with clear protein-containing liquids alone
- Protein-containing clear liquids alone compared with fasting and other clear liquids
- Adding milk or cream to coffee or tea *versus* fasting and other clear liquids
- The impact of carbohydrate-containing clear liquids on glycemic levels in patients with diabetes
- Gum chewing compared with no gum chewing

There is a need for studies evaluating gastric volume, gastric emptying, and aspiration in patients with high risk of regurgitation. Comparators of interest include

- Carbohydrate- and protein-containing clear liquids alone and in combination
- Gum chewing

Rigorous comparisons for equivalence or superiority between 1-h *versus* 2-h fasting durations in pediatric patients are needed.

Moreover, there is a need to study gastric emptying and gastric pH in critically ill patients receiving enteral feeding to determine the shortest safe duration of fasting before surgery in that population to minimize feeding interruptions. In the meantime, the task force wishes to remind clinicians to exercise clinical judgment in minimizing feeding interruptions in critically ill patients whose airways are protected with endotracheal or tracheostomy tubes with properly inflated cuffs undergoing procedures that do not include reintubation or airway manipulations.

Finally, there is a need for education of patients, their caregivers, and healthcare providers regarding avoidance of preoperative fasting beyond the recommended durations and the detrimental effects of prolonged fasting.

## Summary

The task force reaffirms the 2017 recommendations for clear liquids until 2 h preoperatively.<sup>1</sup> Simple or complex carbohydrate-containing clear liquids appear to reduce patient hunger when compared with noncaloric clear liquids. The addition of protein to preoperative carbohydrate-containing clear liquids did not appear to either benefit or harm healthy patients. We further suggest not to delay surgery in healthy adults after confirming removal of chewed gum.

Prolonged fasting has well described adverse consequences. Actively encouraging clear liquids in healthy children as close to 2 h before procedures as possible is important to avoid them.

The task force recommends a robust local effort at each facility disseminating and discussing information shared in this document, providing necessary education to all patient care teams, including but not limited to all members of the anesthesiology and surgical teams, preoperative clinic personnel, preoperative nurses, and hospital floor nurses. Furthermore, it would be necessary to update related policies, printed literature, and wall posters/charts to ensure that patients are receiving consistent messages and instructions from all medical personnel.

## Appendix: Study and Patient Characteristics

### Carbohydrate-containing Clear Liquids

The body of evidence included 139 studies (adult surgical: 99 randomized controlled trials,<sup>23-34,36-64,68-86,91,118-157</sup> 7 non-randomized trials,<sup>65,66,87,152,158-160</sup> 3 prospective cohort studies,<sup>90,161,162</sup> 2 retrospective cohort studies,<sup>163,164</sup> 1 case-control study,<sup>165</sup> and 2 before-after studies<sup>67,166</sup>; adult nonsurgical: 1

randomized controlled trial,<sup>167</sup> 9 crossover,<sup>168–176</sup> and 2 nonrandomized trials<sup>177,178</sup>; pediatric surgical: 9 randomized controlled trials,<sup>100,113,179–185</sup> 1 prospective cohort<sup>186</sup>; and pediatric nonsurgical: 2 randomized controlled trial,<sup>102,104</sup> 1 crossover,<sup>35</sup> and 1 prospective cohort<sup>103</sup> comparing carbohydrate-containing clear liquids (simple, complex) with water, placebo, or fasting. In the carbohydrate arms, liquids were allowed an average of 2.25 h before surgery (80% until 2 h).

The characteristics of randomized trials supporting recommendations for adult surgical patients (aspiration was assessed across study designs, but the strength of evidence was unable to be rated) included a mean of 95 participants (range, 15 to 880). Approximately one half (53%) were conducted in low-resource countries (Human Development Index scores less than 0.8). Industry support was reported in 16 trials, and author conflict of interest was reported in 12 (10%) studies.

Almost all adult study participants had an ASA Physical Status I or II (92%). The mean age was 53.1 yr (range, 26 to 81), and 61% were women. Excluding the single trial of gastric bypass patients, the average of either mean or median body mass index was 25.1 kg/m<sup>2</sup> (range, 21 to 33). Nine (9%) trials included diabetic patients (from 2 to 100% of participants).

### Protein-containing Clear Liquids

All studied protein-containing clear liquids also contained carbohydrates. The body of evidence included 22 adult surgical studies (20 randomized controlled trials,<sup>32,43,49,52–55,57,64,68,73,76,80,85,91,148–152</sup> 1 nonrandomized trial,<sup>90</sup> and 1 retrospective cohort<sup>165</sup>), 7 adult nonsurgical studies (1 randomized controlled trial<sup>167</sup> and 6 crossover studies<sup>170,171,173–176</sup>), and 1 pediatric nonsurgical study<sup>104</sup> comparing the effects of drinking protein-containing clear liquids with fasting or noncaloric clear liquids.

The characteristics of randomized trials supporting recommendations for adult surgical patients included a median of 46 participants (range, 20 to 150). The mean age of participants was 47 yr, 70% were female, and the average body mass index was 23.9 kg/m<sup>2</sup>. Twelve studies (53%) reported enrolling patients rated with ASA Physical Status I or II (2 studies also included ASA Physical Status III, and 9 did not report ASA Physical Status). Four (22%) trials included diabetic patients (from 9 to 31% of participants). Two studies received industry support, and 1 study noted author conflict of interest.

### Chewing Gum

The body of evidence included 10 studies (7 randomized controlled trials,<sup>92–97,187</sup> 1 crossover study,<sup>98</sup> 1 single-arm study,<sup>188</sup> and 1 case series<sup>189</sup>) comparing chewing gum (sugar-free or sugared) with fasting, water, or lollipops. Chewing gum was allowed either until induction or

30 min to 1 h before surgery. Studies enrolled a median of 75 participants (range, 9 to 237). The mean age of participants was 43.2 yr, and 64% were female. Three (30%) studies enrolled patients rated with ASA Physical Status I or II, and 1 (10%) study included ASA Physical Status I to III (6 [60%] studies did not report ASA Physical Status). None of the studies received industry support, and 1 study noted author conflict of interest.

### One-hour Clear Liquid Fasting in Pediatric Patients

The body of evidence included 9 studies (5 randomized controlled trials,<sup>99,100,102,104,106</sup> 1 crossover study,<sup>35</sup> and 3 prospective cohort studies<sup>101,103,105</sup>) providing data on 1- and 2-h fasting in pediatric patients. Only 2 of the trials randomized participants into 1- and 2-h fasting protocols; the remaining studies were not designed to compare 1- and 2-h fasting; however, they included results from pediatric patients fasted less than 2 h.

Most children were ASA Physical Status I or II, although one trial enrolling patients with cyanotic congenital heart disease were more likely of higher ASA Physical Status (ASA Physical Status not reported). One study included younger children (mean age, 3 yr), 2 included children with mean or median age of 5 yr, and the remaining studies reported median ages ranging from 7 to 11 yr. Five studies were conducted in surgical settings, and 4 were nonsurgical. No studies reported industry funding, and 1 (11%) study reported a conflict of interest.

### Research Support

Support was provided by the American Society of Anesthesiologists (Schaumburg, Illinois) and developed under the direction of the Committee on Practice Parameters, Karen B. Domino, M.D., M.P.H. (Chair).

### Competing Interests

Dr. Joshi is a consultant for Baxter Healthcare (Deerfield, Illinois) and Pacira Pharmaceuticals (Parsippany, New Jersey), Dr. Abdelmalak is a consultant and speaker for Acacia Pharma (Duxford, United Kingdom) and Medtronic USA Inc. (Minneapolis, Minnesota), and Dr. Domino has received a research grant from Edwards Life Science Corporation (Irvine, California). The other authors declare no competing interests.

### Correspondence

Address correspondence to American Society of Anesthesiologists: 1061 American Lane, Schaumburg, Illinois 60173. kdomino@uw.edu. This Practice Guideline, as well as all published ASA Practice Parameters, may be obtained at no cost through the Journal Web site, <https://pubs.asahq.org/anesthesiology>.

## Supplemental Digital Content

Systematic Review Protocol, <http://links.lww.com/ALN/C930>  
 PRISMA flowchart, <http://links.lww.com/ALN/C931>  
 Search strategy, <http://links.lww.com/ALN/C932>  
 Excluded studies bibliography with reasoning, <http://links.lww.com/ALN/C933>  
 Supplemental tables, <http://links.lww.com/ALN/C934>  
 Supplemental figures, <http://links.lww.com/ALN/C935>  
 Methods Supplement, <http://links.lww.com/ALN/C962>

## References

1. American Society of Anesthesiologists Committee. Practice guidelines for preoperative fasting and the use of pharmacologic agents to reduce the risk of pulmonary aspiration: Application to healthy patients undergoing elective procedures. An updated report by the American Society of Anesthesiologists task force on preoperative fasting and the use of pharmacologic agents to reduce the risk of pulmonary aspiration. *ANESTHESIOLOGY* 2017; 126:376–93
2. Sakai T, Planinsic RM, Quinlan JJ, Handley LJ, Kim TY, Hilmi IA: The incidence and outcome of perioperative pulmonary aspiration in a university hospital: A 4-year retrospective analysis. *Anesth Analg* 2006; 103:941–7
3. Warner MA, Warner ME, Weber JG: Clinical significance of pulmonary aspiration during the perioperative period. *ANESTHESIOLOGY* 1993; 78:56–62
4. Warner MA, Meyerhoff KL, Warner ME, Posner KL, Stephens L, Domino KB: Pulmonary aspiration of gastric contents: A closed claims analysis. *ANESTHESIOLOGY* 2021; 135:284–91
5. Marik PE: Aspiration pneumonitis and aspiration pneumonia. *N Engl J Med* 2001; 344:665–71
6. Mandell LA, Niederman MS: Aspiration pneumonia. *N Engl J Med* 2019; 380:651–63
7. Grimm M, Koziolok M, Kuhn JP, Weitschies W: Interindividual and intraindividual variability of fasted state gastric fluid volume and gastric emptying of water. *Eur J Pharm Biopharm* 2018; 127:309–17
8. Guyatt GH, Oxman AD, Kunz R, Atkins D, Brozek J, Vist G, Alderson P, Glasziou P, Falck-Ytter Y, Schünemann HJ: GRADE guidelines: 2. Framing the question and deciding on important outcomes. *J Clin Epidemiol* 2011; 64:395–400
9. Evidence Partners: DistillerSR. Ottawa, Canada, Evidence Partners Inc., 2020
10. Rücker G, Krahn U, König J, Efthimiou O, Davies A, Papakonstantinou T, Schwarzer G: netmeta: Network meta-analysis using frequentist methods. R package version 2.5-0. Available at <https://CRAN.R-project.org/package=netmeta>. Accessed October 10, 2022.
11. Beliveau A, Boyne DJ, Slater J, Brenner D, Arora P: Bugsnet: An R package to facilitate the conduct and reporting of Bayesian network meta-analyses. *BMC Med Res Methodol* 2019; 19:196
12. Schwarzer G, Carpenter JR, Rücker G: Meta-analysis with R, New York, Springer, 2015
13. R Core Team: R: A language and environment for statistical computing. Vienna, Austria, R Foundation for Statistical Computing, 2022
14. Balduzzi S, Rücker G, Schwarzer G: How to perform a meta-analysis with R: A practical tutorial. *Evid Based Ment Health* 2019; 22:153–60
15. Schwarzer G, Carpenter JR, Rücker G: metasens: Statistical methods for sensitivity analysis in meta-analysis. R package version 1.5-0. Available at <https://CRAN.R-project.org/package=metasens>. Accessed October 10, 2022.
16. Higgins JP, Altman DG, Gøtzsche PC, Juni P, Moher D, Oxman AD, Savovic J, Schulz KF, Weeks L, Sterne JA; Cochrane Bias Methods Group, Cochrane Statistical Methods Group: The Cochrane Collaboration's tool for assessing risk of bias in randomised trials. *BMJ* 2011; 343:d5928
17. Sterne JA, Hernán MA, Reeves BC, Savovic J, Berkman ND, Viswanathan M, Henry D, Altman DG, Ansari MT, Boutron I, Carpenter JR, Chan AW, Churchill R, Deeks JJ, Hrobjartsson A, Kirkham J, Juni P, Loke YK, Pigott TD, Ramsay CR, Regidor D, Rothstein HR, Sandhu L, Santaguida PL, Schünemann HJ, Shea B, Shrier I, Tugwell P, Turner L, Valentine JC, Waddington H, Waters E, Wells GA, Whiting PF, Higgins JP: ROBINS-I: A tool for assessing risk of bias in non-randomised studies of interventions. *BMJ* 2016; 355:i4919
18. Schünemann H, Brozek J, Guyatt G, Oxman A: GRADE Handbook. Available at <https://gdt.gradepro.org/app/handbook/handbook.html>. Accessed October 10, 2022.
19. Nikolakopoulou A, Higgins JPT, Papakonstantinou T, Chaimani A, Del Giovane C, Egger M, Salanti G: CINeMA: An approach for assessing confidence in the results of a network meta-analysis. *PLoS Med* 2020; 17:e1003082
20. Andrews J, Guyatt G, Oxman AD, Alderson P, Dahm P, Falck-Ytter Y, Nasser M, Meerpohl J, Post PN, Kunz R, Brozek J, Vist G, Rind D, Akl EA, Schünemann HJ: GRADE guidelines: 14. Going from evidence to recommendations—The significance and presentation of recommendations. *J Clin Epidemiol* 2013; 66:719–25
21. Andrews JC, Schünemann HJ, Oxman AD, Pottie K, Meerpohl JJ, Coello PA, Rind D, Montori VM, Brito JP, Norris S, Elbarbary M, Post P, Nasser M, Shukla V, Jaeschke R, Brozek J, Djulbegovic B, Guyatt G: GRADE guidelines: 15. Going from evidence to



- recommendation—Determinants of a recommendation's direction and strength. *J Clin Epidemiol* 2013; 66:726–35
22. Guyatt GH, Alonso-Coello P, Schünemann HJ, Djulbegovic B, Nothacker M, Lange S, Murad MH, Akl EA: Guideline panels should seldom make good practice statements: Guidance from the GRADE working group. *J Clin Epidemiol* 2016; 80:3–7
  23. Hausel J, Nygren J, Lagerkranser M, Hellstrom PM, Hammarqvist F, Almstrom C, Lindh A, Thorell A, Ljungqvist O: A carbohydrate-rich drink reduces preoperative discomfort in elective surgery patients. *Anesth Analg* 2001; 93:1344–50
  24. Breuer JP, von Dossow V, von Heymann C, Griesbach M, von Schickfus M, Mackh E, Hacker C, Elgeti U, Konertz W, Wernecke KD, Spies CD: Preoperative oral carbohydrate administration to ASA III–IV patients undergoing elective cardiac surgery. *Anesth Analg* 2006; 103:1099–108
  25. Helminen H, Viitanen H, Sajanti J: Effect of preoperative intravenous carbohydrate loading on preoperative discomfort in elective surgery patients. *Eur J Anaesthesiol* 2009; 26:123–7
  26. Wang ZG, Wang Q, Wang WJ, QH, Qin HL: Randomized clinical trial to compare the effects of preoperative oral carbohydrate *versus* placebo on insulin resistance after colorectal surgery. *Br J Surg* 2010; 97:317–27
  27. Yagmurdu H, Gunal S, Yildiz H, Gulec H, Topkaya C: The effects of carbohydrate-rich drink on perioperative discomfort, insulin response and arterial pressure in spinal anesthesia. *J Res Med Sci* 2011; 16:1483–9
  28. Tran S, Wolever TM, Errett LE, Ahn H, Mazer CD, Keith M: Preoperative carbohydrate loading in patients undergoing coronary artery bypass or spinal surgery. *Anesth Analg* 2013; 117:305–13
  29. Canbay O, Adar S, Karagoz AH, Celebi N, Bilen CY: Effect of preoperative consumption of high carbohydrate drink (pre-op) on postoperative metabolic stress reaction in patients undergoing radical prostatectomy. *Int Urol Nephrol* 2014; 46:1329–33
  30. Raksakietisak M, Chinachoti T, Iamaroon A, Thabpenthai Y, Halilamien P, Siriratwarangkul S, Watanitanon A: Oral rehydration with 10% carbohydrate drink for preventing postoperative nausea and vomiting (PONV) after low dose of spinal morphine. *J Med Assoc Thai* 2014; 97:530–5
  31. Doo AR, Hwang H, Ki MJ, Lee JR, Kim DC: Effects of preoperative oral carbohydrate administration on patient well-being and satisfaction in thyroid surgery. *Korean J Anesthesiol* 2018; 71:394–400
  32. Helminen H, Branders H, Ohtonen P, Saarnio J: Effect of pre-operative oral carbohydrate loading on recovery after day-case cholecystectomy: A randomised controlled trial. *Eur J Anaesthesiol* 2019; 36:605–11
  33. Rizvanovic N, Nesek Adam V, Causevic S, Dervisevic S, Delibegovic S: A randomised controlled study of preoperative oral carbohydrate loading *versus* fasting in patients undergoing colorectal surgery. *Int J Colorectal Dis* 2019; 34:1551–61
  34. Wang Y, Zhu Z, Li H, Sun Y, Xie G, Cheng B, Ji F, Fang X: Effects of preoperative oral carbohydrates on patients undergoing esd surgery under general anesthesia: A randomized control study. *Medicine (Baltim)* 2019; 98:e15669
  35. Zhang YL, Li H, Zeng H, Li Q, Qiu LP, Dai RP: Ultrasonographic evaluation of gastric emptying after ingesting carbohydrate-rich drink in young children: A randomized crossover study. *Paediatr Anaesth* 2020; 30:599–606
  36. Panebianco A, Laforgia R, Volpi A, Punzo C, Vacca G, Minafra M, Di Salvo M, Pezzolla A: Preoperative fasting—“nihil per os” a difficult myth to break down: A randomized controlled study. *G Chir* 2020; 41:84–93
  37. Wendling AL, Byun SY, Koenig M, Vasilopoulos T: Impact of oral carbohydrate consumption prior to cesarean delivery on preoperative well-being: A randomized interventional study. *Arch Gynecol Obstet* 2020; 301:179–87
  38. Cho EA, Huh J, Lee SH, Ryu KH, Shim JG, Cha YB, Kim MS, Song T: Gastric ultrasound assessing gastric emptying of preoperative carbohydrate drinks: A randomized controlled noninferiority study. *Anesth Analg* 2021; 133:690–7
  39. He Y, Liu C, Han Y, Huang Y, Zhou J, Xie Q: The impact of oral carbohydrate-rich supplement taken two hours before caesarean delivery on maternal and neonatal perioperative outcomes—A randomized clinical trial. *BMC Pregnancy Childbirth* 2021; 21:682
  40. Wang Y, Tu Y, Liu Z, Li H, Chen H, Cheng B, Fang X: Effects of preoperative oral carbohydrate on cirrhotic patients under endoscopic therapy with anesthesia: A randomized controlled trial. *Biomed Res Int* 2021; 2021:1405271
  41. Wang S, Gao PF, Guo X, Xu Q, Zhang YF, Wang GQ, Lin JY: Effect of low-concentration carbohydrate on patient-centered quality of recovery in patients undergoing thyroidectomy: A prospective randomized trial. *BMC Anesthesiol* 2021; 21:103
  42. Li X, Liu L, Liang XQ, Li YT, Wang DX: Preoperative carbohydrate loading with individualized supplemental insulin in diabetic patients undergoing gastrointestinal surgery: A randomized trial. *Int J Surg* 2022; 98:106215
  43. Koeppe AT, Lubini M, Bonadeo NM, Moraes I Jr, Fornari F: Comfort, safety and quality of upper gastrointestinal endoscopy after 2 hours fasting: A randomized controlled trial. *BMC Gastroenterol* 2013; 13:158
  44. Yildiz H, Gunal SE, Yilmaz G, Yucel S: Oral carbohydrate supplementation reduces preoperative discomfort in laparoscopic cholecystectomy. *J Invest Surg* 2013; 26:89–95

45. Gök MA, Kafadar MT, Yeğen SF: Effects of preoperative oral carbohydrate loading on preoperative and postoperative comfort in patients planned to undergo elective cholecystectomy: A prospective randomized controlled clinical trial. *Iran Red Crescent Med J* 2020; 22:e107
46. Ajuzieogu OV, Amucheazi AO, Nwagha UI, Ezike HA, Luka SK, Abam DS: Effect of routine preoperative fasting on residual gastric volume and acid in patients undergoing myomectomy. *Niger J Clin Pract* 2016; 19:816–20
47. Melis GC, van Leeuwen PA, von Blomberg-van der Flier BM, Goedhart-Hiddinga AC, Uitdehaag BM, Strack van Schijndel RJ, Wuisman PI, van Bokhorst-de van der Schueren MA: A carbohydrate-rich beverage prior to surgery prevents surgery-induced immunodepression: A randomized, controlled, clinical trial. *JPEN J Parenter Enteral Nutr* 2006; 30:21–6
48. Jarvela K, Maaranen P, Sisto T: Pre-operative oral carbohydrate treatment before coronary artery bypass surgery. *Acta Anaesthesiol Scand* 2008; 52:793–7
49. Dock-Nascimento DB, Aguilar-Nascimento JE, Linetzky Waitzberg D: Ingestion of glutamine and maltodextrin two hours preoperatively improves insulin sensitivity after surgery: A randomized, double blind, controlled trial. *Rev Col Bras Cir* 2012; 39:449–55
50. Itou K, Fukuyama T, Sasabuchi Y, Yasuda H, Suzuki N, Hinenoya H, Kim C, Sanui M, Taniguchi H, Miyao H, Seo N, Takeuchi M, Iwao Y, Sakamoto A, Fujita Y, Suzuki T: Safety and efficacy of oral rehydration therapy until 2h before surgery: A multicenter randomized controlled trial. *J Anesth* 2012; 26:20–7
51. Nakai K, Niwa H, Kitayama M, Satoh Y, Hirota K: Effects of oral rehydration therapy on gastric volume and pH in patients with preanesthetic h2 antagonist. *J Anesth* 2012; 26:936–8
52. Peixe-Machado PA, de Oliveira BD, Dock-Nascimento DB, de Aguilar-Nascimento JE: Shrinking preoperative fast time with maltodextrin and protein hydrolysate in gastrointestinal resections due to cancer. *Nutrition* 2013; 29:1054–9
53. Asakura A, Mihara T, Goto T: The effect of preoperative oral carbohydrate or oral rehydration solution on postoperative quality of recovery: A randomized, controlled clinical trial. *PLoS One* 2015; 10:e0133309
54. de Andrade Gagheggi Ravanini G, Portari Filho PE, Abrantes Luna R, Almeida de Oliveira V: Organic inflammatory response to reduced preoperative fasting time, with a carbohydrate and protein enriched solution: A randomized trial. *Nutr Hosp* 2015; 32:953–7
55. Singh M, Chaudhary M, Vashistha A, Kaur G: Evaluation of effects of a preoperative 2-hour fast with glutamine and carbohydrate rich drink on insulin resistance in maxillofacial surgery. *J Oral Biol Craniofac Res* 2015; 5:34–9
56. Celiksular MC, Saracoglu A, Yentur E: The influence of oral carbohydrate solution intake on stress response before total hip replacement surgery during epidural and general anaesthesia. *Turk J Anaesthesiol Reanim* 2016; 44:117–23
57. Karlsson A, Wendel K, Polits S, Gislason H, Hedenbro JL: Preoperative nutrition and postoperative discomfort in an eras setting: A randomized study in gastric bypass surgery. *Obes Surg* 2016; 26:743–8
58. Cakar E, Yilmaz E, Cakar E, Baydur H: The effect of preoperative oral carbohydrate solution intake on patient comfort: A randomized controlled study. *J Perianesth Nurs* 2017; 32:589–99
59. Lee JS, Song Y, Kim JY, Park JS, Yoon DS: Effects of preoperative oral carbohydrates on quality of recovery in laparoscopic cholecystectomy: A randomized, double blind, placebo-controlled trial. *World J Surg* 2018; 42:3150–7
60. Onalan E, Andsoy II, Ersoy OF: The effect of preoperative oral carbohydrate administration on insulin resistance and comfort level in patients undergoing surgery. *J Perianesth Nurs* 2019; 34:539–50
61. Zhang Y, Min J: Preoperative carbohydrate loading in gynecological patients undergoing combined spinal and epidural anesthesia. *J Invest Surg* 2020; 33:587–95
62. Joshi Y, Dhamija S: Randomized control clinical trial of overnight fasting to clear fluid feeding 2 hours prior anaesthesia and surgery. *Indian J Surg* 2021; 83:248–54
63. Shi M, Hu Z, Yang D, Cai Q, Zhu Z: Preoperative oral carbohydrate reduces postoperative insulin resistance by activating amp-activated protein kinase after colorectal surgery. *Dig Surg* 2020; 37:368–75
64. Yi HC, Ibrahim Z, Abu Zaid Z, Mat Daud Z, Md Yusop NB, Omar J, Mohd Abas MN, Abdul Rahman Z, Jamhuri N: Impact of enhanced recovery after surgery with preoperative whey protein-infused carbohydrate loading and postoperative early oral feeding among surgical gynecologic cancer patients: An open-labelled randomized controlled trial. *Nutrients* 2020; 12:264
65. Vigano J, Cereda E, Caccialanza R, Carini R, Cameletti B, Spampinato M, Dionigi P: Effects of preoperative oral carbohydrate supplementation on postoperative metabolic stress response of patients undergoing elective abdominal surgery. *World J Surg* 2012; 36:1738–43
66. De Jonghe B, Fajardy A, Merian-Brosse L, Fauconnier A, Chouillard E, Debit N, Solus H, Tabary N, Segulier JC, Melchior JC: Reducing pre-operative fasting while preserving operating room scheduling flexibility: Feasibility and impact on patient discomfort. *Acta Anaesthesiol Scand* 2016; 60:1222–9

67. Weledji EP, Njong SN, Chichom A, Verla V, Assob JC, Ngowe MN: The effects of preoperative carbohydrate loading on the metabolic response to surgery in a low resource setting. *Int J Surg Open* 2017; 8:18–23
68. Dock-Nascimento DB, de Aguilar-Nascimento JE, Magalhaes Faria MS, Caporossi C, Shlessarenko N, Waitzberg DL: Evaluation of the effects of a preoperative 2-hour fast with maltodextrine and glutamine on insulin resistance, acute-phase response, nitrogen balance, and serum glutathione after laparoscopic cholecystectomy: A controlled randomized trial. *JPEN J Parenter Enteral Nutr* 2012; 36:43–52
69. Jeong JY, Ahn JH, Shim JG, Lee SH, Ryu KH, Lee SH, Cho EA: Gastric emptying of preoperative carbohydrate in elderly assessed using gastric ultrasonography: A randomized controlled study. *Medicine (Baltim)* 2021; 100:e27242
70. Yilmaz N, Cekmen N, Bilgin F, Erten E, Ozhan MO, Cosar A: Preoperative carbohydrate nutrition reduces postoperative nausea and vomiting compared to preoperative fasting. *J Res Med Sci* 2013; 18:827–32
71. Yagci G, Can MF, Ozturk E, Dag B, Ozgurtas T, Cosar A, Tufan T: Effects of preoperative carbohydrate loading on glucose metabolism and gastric contents in patients undergoing moderate surgery: A randomized, controlled trial. *Nutrition* 2008; 24:212–6
72. Lauwick SM, Kaba A, Maweja S, Hamoir EE, Joris JL: Effects of oral preoperative carbohydrate on early postoperative outcome after thyroidectomy. *Acta Anaesthesiol Belg* 2009; 60:67–73
73. Tsutsumi R, Kakuta N, Kadota T, Oyama T, Kume K, Hamaguchi E, Niki N, Tanaka K, Tsutsumi YM: Effects of oral carbohydrate with amino acid solution on the metabolic status of patients in the preoperative period: A randomized, prospective clinical trial. *J Anesth* 2016; 30:842–9
74. Clark A, Litchfield K, Hannah S, Love C, Slade K, Lake K, Agaram R: Pre-operative carbohydrate loading prior to elective caesarean delivery: A randomised controlled trial. *Int J Obstet Anesth* 2021; 45:21–7
75. Liu N, Jin Y, Wang X, Xiang Z, Zhang L, Feng S: Safety and feasibility of oral carbohydrate consumption before cesarean delivery on patients with gestational diabetes mellitus: A parallel, randomized controlled trial. *J Obstet Gynaecol Res* 2021; 47:1272–80
76. Henriksen MG, Hessev I, Dela F, Hansen HV, Haraldsted V, Rodt SA: Effects of preoperative oral carbohydrates and peptides on postoperative endocrine response, mobilization, nutrition and muscle function in abdominal surgery. *Acta Anaesthesiol Scand* 2003; 47:191–9
77. Zhang Z, Wang RK, Duan B, Cheng ZG, Wang E, Guo QL, Luo H: Effects of a preoperative carbohydrate-rich drink before ambulatory surgery: A randomized controlled, double-blinded study. *Med Sci Monit* 2020; 26:e922837
78. Feguri GR, Lima PR, Lopes AM, Roledo A, Marchese M, Trevisan M, Ahmad H, Freitas BB, Aguilar-Nascimento JE: Clinical and metabolic results of fasting abbreviation with carbohydrates in coronary artery bypass graft surgery. *Rev Bras Cir Cardiovasc* 2012; 27:7–17
79. Liu X, Zhang P, Liu MX, Ma JL, Wei XC, Fan D: Preoperative carbohydrate loading and intraoperative goal-directed fluid therapy for elderly patients undergoing open gastrointestinal surgery: A prospective randomized controlled trial. *BMC Anesthesiol* 2021; 21:157
80. Marquini GV, Pinheiro FES, Vieira AUC, Pinto RMC, Uyeda M, Girao M, Sartori MGF: Effects of preoperative fasting abbreviation with carbohydrate and protein solution on postoperative symptoms of gynecological surgeries: Double-blind randomized controlled clinical trial. *Rev Col Bras Cir* 2020; 46:e20192295
81. Bisgaard T, Kristiansen VB, Hjortso NC, Jacobsen LS, Rosenberg J, Kehlet H: Randomized clinical trial comparing an oral carbohydrate beverage with placebo before laparoscopic cholecystectomy. *Br J Surg* 2004; 91:151–8
82. Gianotti L, Biffi R, Sandini M, Marrelli D, Vignali A, Caccialanza R, Vigano J, Sabbatini A, Di Mare G, Alessiani M, Antomarchi F, Valsecchi MG, Bernasconi DP: Preoperative oral carbohydrate load *versus* placebo in major elective abdominal surgery (PROCY): A randomized, placebo-controlled, multicenter, phase III trial. *Ann Surg* 2018; 267:623–30
83. Feguri GR, Lima PRL, Franco AC, Cruz FRH, Borges DC, Toledo LR, Segri NJ, Aguilar-Nascimento JE: Benefits of fasting abbreviation with carbohydrates and omega-3 infusion during CABG: A double-blind controlled randomized trial. *Braz J Cardiovasc Surg* 2019; 34:125–35
84. Wongyingsinn M, Luangchan S, Tungsongsawat S, Trakarnsanga A, Lohsiriwat V: A randomized controlled trial of preoperative carbohydrate drinks on postoperative walking capacity in elective colorectal surgery. *Asia Pac J Clin Nutr* 2019; 28:727–33
85. Perrone F, da-Silva-Filho AC, Adorno IF, Anabuki NT, Leal FS, Colombo T, da Silva BD, Dock-Nascimento DB, Damiao A, de Aguilar-Nascimento JE: Effects of preoperative feeding with a whey protein plus carbohydrate drink on the acute phase response and insulin resistance. A randomized trial. *Nutr J* 2011; 10:66
86. Doctor JR, Chandan P, Shetty N, Gala K, Ranganathan P: Ultrasound-guided assessment of gastric residual volume in patients receiving three types of clear fluids: A randomised blinded study. *Indian J Anaesth* 2021; 65:289–94

87. Spahn TW, Wessels A, Grosse-Thie W, Mueller MK: Assessment of pre-gastroscopy fasting period using ultrasonography. *Dig Dis Sci* 2009; 54:621–6
88. Goyal RK: Gastric emptying abnormalities in diabetes mellitus. *N Engl J Med* 2021; 384:1742–51
89. Sabry R, Hasanin A, Refaat S, Abdel Raouf S, Abdallah AS, Helmy N: Evaluation of gastric residual volume in fasting diabetic patients using gastric ultrasound. *Acta Anaesthesiol Scand* 2019; 63:615–9
90. Oyama Y, Iwasaka H, Shiihara K, Hagiwara S, Kubo N, Fujitomi Y, Noguchi T: Effects of preoperative oral carbohydrates and trace elements on perioperative nutritional status in elective surgery patients. *Middle East J Anaesthesiol* 2011; 21:375–83
91. de Aguiar-Nascimento JE, Caporossi C, Metelo JS, Tanajura GH, Canevari-de-Oliveira M, da Cunha Costa R: Safe intake of an oral supplement containing carbohydrates and whey protein shortly before sedation to gastroscopy; a double blind, randomized trial. *Nutr Hosp* 2014; 29:681–6
92. Soreide E, Holst-Larsen H, Veel T, Steen PA: The effects of chewing gum on gastric content prior to induction of general anesthesia. *Anesth Analg* 1995; 80:985–9
93. Garcia AKA, Furuya RK, Conchon MF, Rossetto EG, Dantas RAS, Fonseca LF: Menthol chewing gum on preoperative thirst management: Randomized clinical trial. *Rev Lat Am Enfermagem* 2019; 27:e3180
94. Dubin SA, Jense HG, McCranie JM, Zubar V: Sugarless gum chewing before surgery does not increase gastric fluid volume or acidity. *Can J Anaesth* 1994; 41:603–6
95. Hamid K, Masoud L, Reza FH, Mehran G, Karmella K: Comparison of different non-pharmacological preoperative preparations on gastric fluid volume and acidity: A randomized controlled trial. *Anaesth Pain Intensive Care* 2012; 16:165–8
96. Goudra BG, Singh PM, Carlin A, Manjunath AK, Reihmer J, Gouda GB, Ginsberg GG: Effect of gum chewing on the volume and pH of gastric contents: A prospective randomized study. *Dig Dis Sci* 2015; 60:979–83
97. Best GW, Fanning SB, Robertson IK, Blackford D, Mitchell BL: Assessing the effect of sugar-free chewing gum use on the residual gastric volume of patients fasting for gastroscopy: A randomised controlled trial. *Anaesth Intensive Care* 2019; 47:541–7
98. Bouvet L, Loubradou E, Desgranges FP, Chassard D: Effect of gum chewing on gastric volume and emptying: A prospective randomized crossover study. *Br J Anaesth* 2017; 119:928–33
99. Schmidt AR, Buehler P, Seglias L, Stark T, Brotschi B, Renner T, Sabandal C, Klaghofer R, Weiss M, Schmitz A: Gastric pH and residual volume after 1 and 2 h fasting time for clear fluids in children. *Br J Anaesth* 2015; 114:477–82
100. Huang X, Zhang H, Lin Y, Chen L, Peng Y, Jiang F, Lin F, Li S, Lin L: Effect of oral glucose water administration 1 hour preoperatively in children with cyanotic congenital heart disease: A randomized controlled trial. *Med Sci Monit* 2020; 26:e922642
101. Beck CE, Rudolph D, Mahn C, Etspuler A, Korf M, Luthke M, Schindler E, Paukert S, Trapp A, Megens J, Oppitz F, Badelt G, Roher K, Genahr A, Fink G, Muller-Lobeck L, Becke-Jakob K, Wermelt JZ, Boethig D, Eich C, Sumpelmann R: Impact of clear fluid fasting on pulmonary aspiration in children undergoing general anesthesia: Results of the German prospective multicenter observational (NiKS) study. *Paediatr Anaesth* 2020; 30:892–9
102. Sethi AK, Chatterji C, Bhargava SK, Narang P, Tyagi A: Safe pre-operative fasting times after milk or clear fluid in children. A preliminary study using real-time ultrasound. *Anaesthesia* 1999; 54:51–9
103. Schmitz A, Kellenberger CJ, Liamlahi R, Studhalter M, Weiss M: Gastric emptying after overnight fasting and clear fluid intake: A prospective investigation using serial magnetic resonance imaging in healthy children. *Br J Anaesth* 2011; 107:425–9
104. Du T, Hill L, Ding L, Towbin AJ, DeJonckheere M, Bennett P, Hagerman N, Varughese AM, Pratap JN: Gastric emptying for liquids of different compositions in children. *Br J Anaesth* 2017; 119:948–55
105. Beck CE, Chandrakumar T, Sumpelmann R, Nickel K, Keil O, Heiderich S, Boethig D, Witt L, Dennhardt N: Ultrasound assessment of gastric emptying time after intake of clear fluids in children scheduled for general anesthesia: A prospective observational study. *Paediatr Anaesth* 2020; 30:1384–9
106. Taye S, Mohammed S, Bhatia P, Kumar M, Chhabra S, Kumar R, Kumari K: Gastric emptying time of two different quantities of clear fluids in children: A double-blinded randomized controlled study. *Paediatr Anaesth* 2021; 31:1187–93
107. Brunet-Wood K, Simons M, Evasiuk A, Mazurak V, Dicken B, Ridley D, Larsen B: Surgical fasting guidelines in children: Are we putting them into practice? *J Pediatr Surg* 2016; 51:1298–302
108. Engelhardt T, Wilson G, Horne L, Weiss M, Schmitz A: Are you hungry? Are you thirsty?—Fasting times in elective outpatient pediatric patients. *Paediatr Anaesth* 2011; 21:964–8
109. Dolgun E, Yavuz M, Eroglu B, Islamoglu A: Investigation of preoperative fasting times in children. *J Perianesth Nurs* 2017; 32:121–4
110. Andersson H, Schmitz A, Frykholm P: Preoperative fasting guidelines in pediatric anesthesia: Are we ready for a change? *Curr Opin Anaesthesiol* 2018; 31:342–8
111. Cantellow S, Lightfoot J, Bould H, Beringer R: Parents' understanding of and compliance with fasting instruction for pediatric day case surgery. *Paediatr Anaesth* 2012; 22:897–900



112. Arun BG, Korula G: Preoperative fasting in children: An audit and its implications in a tertiary care hospital. *J Anaesthesiol Clin Pharmacol* 2013; 29:88–91
113. Carvalho C, Carvalho AA, Preza ADG, Nogueira PLB, Mendes KBV, Dock-Nascimento DB, Aguilar-Nascimento JE: Metabolic and inflammatory benefits of reducing preoperative fasting time in pediatric surgery. *Rev Col Bras Cir* 2020; 47:e20202353
114. van Veen MR, van Hasselt PM, de Sain-van der Velden MG, Verhoeven N, Hofstede FC, de Koning TJ, Visser G: Metabolic profiles in children during fasting. *Pediatrics* 2011; 127:e1021–7
115. Frykholm P, Disma N, Andersson H, Beck C, Bouvet L, Cercueil E, Elliott E, Hofmann J, Isserman R, Klauca A, Kuhn F, de Queiroz Siqueira M, Rosen D, Rudolph D, Schmidt AR, Schmitz A, Stocki D, Sumpelmann R, Stricker PA, Thomas M, Veyckemans F, Afshari A: Pre-operative fasting in children: A guideline from the European Society of Anaesthesiology and Intensive Care. *Eur J Anaesthesiol* 2022; 39:4–25
116. Dobson G, Filteau L, Fuda G, McIntyre I, Milne AD, Milkovich R, Sparrow K, Wang Y, Young C: Guidelines to the practice of anesthesia – Revised edition 2022. *Can J Anaesth* 2022; 69:24–61
117. Disma N, Frykholm P, Cook-Sather SD, Lerman J: Pro–con debate: 1- vs. 2-hour fast for clear liquids before anesthesia in children. *Anesth Analg* 2021; 133:581–91
118. Lee B, Soh S, Shim JK, Kim HY, Lee H, Kwak YL: Evaluation of preoperative oral carbohydrate administration on insulin resistance in off-pump coronary artery bypass patients: A randomised trial. *Eur J Anaesthesiol* 2017; 34:740–7
119. Rapp-Kesek D, Stridsberg M, Andersson LG, Berne C, Karlsson T: Insulin resistance after cardiopulmonary bypass in the elderly patient. *Scand Cardiovasc J* 2007; 41:102–8
120. Savluk OF, Kusec MA, Guzelmeric F, Gurcu ME, Erkilinc A, Cevirme D, Ogus H, Kocak T: Do preoperative oral carbohydrates improve postoperative outcomes in patients undergoing coronary artery bypass grafts? *Turk J Med Sci* 2017; 47:1681–6
121. Faria MS, de Aguilar-Nascimento JE, Pimenta OS, Alvarenga LC Jr, Dock-Nascimento DB, Shlessarenko N: Preoperative fasting of 2 hours minimizes insulin resistance and organic response to trauma after video-cholecystectomy: A randomized, controlled, clinical trial. *World J Surg* 2009; 33:1158–64
122. Zelic M, Stimac D, Mendrila D, Tokmadzic VS, Fistic E, Uravic M, Sustic A: Preoperative oral feeding reduces stress response after laparoscopic cholecystectomy. *Hepatogastroenterology* 2013; 60:1602–6
123. Singh BN, Dahiya D, Bagaria D, Saini V, Kaman L, Kaje V, Vagadiya A, Sarin S, Edwards R, Attri V, Jain K: Effects of preoperative carbohydrates drinks on immediate postoperative outcome after day care laparoscopic cholecystectomy. *Surg Endosc* 2015; 29:3267–72
124. Pedziwiatr M, Pisarska M, Matlok M, Major P, Kisielewski M, Wierdak M, Natkaniec M, Budzynski P, Rubinkiewicz M, Budzynski R: Randomized clinical trial to compare the effects of preoperative oral carbohydrate loading *versus* placebo on insulin resistance and cortisol level after laparoscopic cholecystectomy. *Pol Przegl Chir* 2015; 87:402–8
125. Hausel J, Nygren J, Thorell A, Lagerkranser M, Ljungqvist O: Randomized clinical trial of the effects of oral preoperative carbohydrates on postoperative nausea and vomiting after laparoscopic cholecystectomy. *Br J Surg* 2005; 92:415–21
126. Webster J, Osborne SR, Gill R, Chow CF, Wallin S, Jones L, Tang A: Does preoperative oral carbohydrate reduce hospital stay? A randomized trial. *AORN J* 2014; 99:233–42
127. Karimian N, Kaneva P, Donatelli F, Stein B, Liberman AS, Charlebois P, Lee L, Fiore JF Jr, Carli F, Feldman LS: Simple *versus* complex preoperative carbohydrate drink to preserve perioperative insulin sensitivity in laparoscopic colectomy: A randomized controlled trial. *Ann Surg* 2020; 271:819–26
128. Kaska M, Grosmanova T, Havel E, Hyspler R, Petrova Z, Brtko M, Bares P, Bares D, Schusterova B, Pyszkova L, Tosnerova V, Sluka M: The impact and safety of preoperative oral or intravenous carbohydrate administration *versus* fasting in colorectal surgery—A randomized controlled trial. *Wien Klin Wochenschr* 2010; 122:23–30
129. Sada F, Krasniqi A, Hamza A, Gecaj-Gashi A, Bicaj B, Kavaja F: A randomized trial of preoperative oral carbohydrates in abdominal surgery. *BMC Anesthesiol* 2014; 14:93
130. Mathur S, Plank LD, McCall JL, Shapkov P, McIlroy K, Gillanders LK, Merrie AE, Torrie JJ, Pugh F, Koea JB, Bissett IP, Parry BR: Randomized controlled trial of preoperative oral carbohydrate treatment in major abdominal surgery. *Br J Surg* 2010; 97:485–94
131. Svanfeldt M, Thorell A, Hausel J, Soop M, Rooyackers O, Nygren J, Ljungqvist O: Randomized clinical trial of the effect of preoperative oral carbohydrate treatment on postoperative whole-body protein and glucose kinetics. *Br J Surg* 2007; 94:1342–50
132. Noblett SE, Watson DS, Huong H, Davison B, Hainsworth PJ, Horgan AF: Pre-operative oral carbohydrate loading in colorectal surgery: A randomized controlled trial. *Colorectal Dis* 2006; 8:563–9

133. Lidder P, Thomas S, Fleming S, Hosie K, Shaw S, Lewis S: A randomized placebo controlled trial of preoperative carbohydrate drinks and early postoperative nutritional supplement drinks in colorectal surgery. *Colorectal Dis* 2013; 15:737–45
134. Nascimento AC, Goveia CS, Guimaraes GMN, Filho RPL, Ladeira LCA, Silva HBG: Assessment of gastric emptying of maltodextrin, coffee with milk and orange juice during labour at term using point of care ultrasound: A non-inferiority randomised clinical trial. *Anaesthesia* 2019; 74:856–61
135. Esaki K, Tsukamoto M, Sakamoto E, Yokoyama T: Effects of preoperative oral carbohydrate therapy on perioperative glucose metabolism during oral–maxillofacial surgery: Randomised clinical trial. *Asia Pac J Clin Nutr* 2018; 27:137–43
136. Liu B, Wang Y, Liu S, Zhao T, Zhao B, Jiang X, Ye L, Zhao L, Lv W, Zhang Y, Zheng T, Xue Y, Chen L, Chen L, Wu Y, Li Z, Yan J, Wang S, Sun X, Gao G, Qu Y, He S: A randomized controlled study of preoperative oral carbohydrate loading *versus* fasting in patients undergoing elective craniotomy. *Clin Nutr* 2019; 38:2106–12
137. Harsten A, Hjartarson H, Toksvig-Larsen S: Total hip arthroplasty and perioperative oral carbohydrate treatment: A randomised, double-blind, controlled trial. *Eur J Anaesthesiol* 2012; 29:271–4
138. Dilmen OK, Yentur E, Tunali Y, Balci H, Bahar M: Does preoperative oral carbohydrate treatment reduce the postoperative surgical stress response in lumbar disc surgery? *Clin Neurol Neurosurg* 2017; 153:82–6
139. Yang Y, Zhou Y: Effects and safety of preoperative oral carbohydrates in radical distal gastrectomy—A randomized clinical trial. *J Cancer Sci Ther* 2012; 4:116–9
140. Yuill KA, Richardson RA, Davidson HI, Garden OJ, Parks RW: The administration of an oral carbohydrate-containing fluid prior to major elective upper-gastrointestinal surgery preserves skeletal muscle mass postoperatively—A randomised clinical trial. *Clin Nutr* 2005; 24:32–7
141. Tewari N, Awad S, Duska F, Williams JP, Bennett A, Macdonald IA, Lobo DN: Postoperative inflammation and insulin resistance in relation to body composition, adiposity and carbohydrate treatment: A randomised controlled study. *Clin Nutr* 2019; 38:204–12
142. Protic A, Turina D, Matanic D, Spanjol J, Zuvic-Butorac M, Sustic A: Effect of preoperative feeding on gastric emptying following spinal anesthesia: A randomized controlled trial. *Wien Klin Wochenschr* 2010; 122:50–3
143. Soop M, Nygren J, Myrenfors P, Thorell A, Ljungqvist O: Preoperative oral carbohydrate treatment attenuates immediate postoperative insulin resistance. *Am J Physiol Endocrinol Metab* 2001; 280:E576–83
144. Soop M, Nygren J, Thorell A, Weidenhielm L, Lundberg M, Hammarqvist F, Ljungqvist O: Preoperative oral carbohydrate treatment attenuates endogenous glucose release 3 days after surgery. *Clin Nutr* 2004; 23:733–41
145. Aronsson A, Al-Ani NA, Brismar K, Hedstrom M: A carbohydrate-rich drink shortly before surgery affected IGF-I bioavailability after a total hip replacement. A double-blind placebo controlled study on 29 patients. *Aging Clin Exp Res* 2009; 21:97–101
146. Ljunggren S, Hahn RG: Oral nutrition or water loading before hip replacement surgery: A randomized clinical trial. *Trials* 2012; 13:97
147. Ljunggren S, Hahn RG, Nystrom T: Insulin sensitivity and beta-cell function after carbohydrate oral loading in hip replacement surgery: A double-blind, randomised controlled clinical trial. *Clin Nutr* 2014; 33:392–8
148. Borges Dock-Nascimento D, Aguilar-Nascimento JE, Caporossi C, Sepulveda Magalhaes Faria M, Bragagnolo R, Caporossi FS, Linetzky Waitzberg D: Safety of oral glutamine in the abbreviation of preoperative fasting: A double-blind, controlled, randomized clinical trial. *Nutr Hosp* 2011; 26:86–90
149. Marquini GV, da Silva Pinheiro FE, da Costa Vieira AU, da Costa Pinto RM, Kuster Uyeda MGB, Girao M, Sartori MGF: Preoperative fasting abbreviation (enhanced recovery after surgery protocol) and effects on the metabolism of patients undergoing gynecological surgeries under spinal anesthesia: A randomized clinical trial. *Nutrition* 2020; 77:110790
150. Marquini GV, Pinheiro F, Vieira A, Pinto R, Uyeda M, Girao M, Sartori MGF: Preoperative fasting abbreviation and its effects on postoperative nausea and vomiting incidence in gynecological surgery patients. *Rev Bras Ginecol Obstet* 2020; 42:468–75
151. van Stijn MFM, Soeters MR, van Leeuwen PAM, Schreurs WH, Schoorl MG, Twisk JWR, De Bandt JP, Bonnefont-Rousselot D, Cynober L, Ackermans MT, Serlie MJ, Houdijk APJ: Effects of a carbohydrate-, glutamine-, and antioxidant-enriched oral nutrition supplement on major surgery-induced insulin resistance: A randomized pilot study. *JPEN J Parenter Enteral Nutr* 2018; 42:719–29
152. Braga M, Bissolati M, Rocchetti S, Beneduce A, Pecorelli N, Di Carlo V: Oral preoperative antioxidants in pancreatic surgery: A double-blind, randomized, clinical trial. *Nutrition* 2012; 28:160–4
153. Labuschagne GS, Morris RW: The effect of oral intake during the immediate pre-colonoscopy time period on volume depletion in patients who receive sodium picosulfate. *Anaesth Intensive Care* 2017; 45:485–9
154. Kweon SH, Park JS, Lee YC: Oral carbohydrate administration in patients undergoing cephalomedullary nailing for proximal femur fractures: An analysis

- of clinical outcomes and patient satisfaction. *Geriatr Orthop Surg Rehabil* 2020; 11:2151459320958609
155. Cho EA, Lee NH, Ahn JH, Choi WJ, Byun JH, Song T: Preoperative oral carbohydrate loading in laparoscopic gynecologic surgery: A randomized controlled trial. *J Minim Invasive Gynecol* 2021; 28:1086–94.e1
  156. Gumus K, Pirhan Y, Aydin G, Keloglan S, Tasova V, Kahveci M: The effect of preoperative oral intake of liquid carbohydrate on postoperative stress parameters in patients undergoing laparoscopic cholecystectomy: An experimental study. *J Perianesth Nurs* 2021; 36:526–31
  157. Shi Y, Dong B, Dong Q, Zhao Z, Yu Y: Effect of preoperative oral carbohydrate administration on patients undergoing cesarean section with epidural anesthesia: A pilot study. *J Perianesth Nurs* 2021; 36:30–5
  158. Bang P, Thorell A, Carlsson-Skwirut C, Ljungqvist O, Brismar K, Nygren J: Free dissociable IGF-I: Association with changes in igfbp-3 proteolysis and insulin sensitivity after surgery. *Clin Nutr* 2016; 35:408–13
  159. Hellstrom PM, Samuelsson B, Al-Ani AN, Hedstrom M: Normal gastric emptying time of a carbohydrate-rich drink in elderly patients with acute hip fracture: A pilot study. *BMC Anesthesiol* 2017; 17:23
  160. Adamova Z, Slovacek R: Effects of preoperative carbohydrate drinks on postoperative outcome after colorectal surgery. *Eur Surg* 2017; 49:180–6
  161. Taniguchi H, Sasaki T, Fujita H: Oral rehydration therapy for preoperative fluid and electrolyte management. *Int J Med Sci* 2011; 8:501–9
  162. Popivanov P, Irwin R, Walsh M, Leonard M, Tan T: Gastric emptying of carbohydrate drinks in term parturients before elective caesarean delivery: An observational study. *Int J Obstet Anesth* 2020; 41:29–34
  163. Talutis SD, Lee SY, Cheng D, Rosenkranz P, Alexanian SM, McAneny D: The impact of preoperative carbohydrate loading on patients with type II diabetes in an enhanced recovery after surgery protocol. *Am J Surg* 2020; 220:999–1003
  164. Alimena S, Falzone M, Feltmate CM, Prescott K, Contrino Slattery L, Elias K: Perioperative glycemic measures among non-fasting gynecologic oncology patients receiving carbohydrate loading in an enhanced recovery after surgery (ERAS) protocol. *Int J Gynecol Cancer* 2020; 30:533–40
  165. Blum CL, Akerman M, Callari M, Jordan E, Capozzi JD: Association of nausea and length of stay with carbohydrate loading prior to total joint arthroplasty. *J Clin Outcomes Manag* 2019; 26:175–9
  166. Pachella LA, Mehran RJ, Curtin K, Schneider SM: Preoperative carbohydrate loading in patients undergoing thoracic surgery: A quality-improvement project. *J Perianesth Nurs* 2019; 34:1250–6
  167. Pai SL, Bojaxhi E, Logvinov, II, Porter S, Feinglass NG, Robards CB, Torp KD: Gastric emptying of “clear liquid drinks” assessed with gastric ultrasonography: A blinded, randomized pilot study. *Minerva Anesthesiol* 2020; 86:165–71
  168. Bisinotto FMB, Naves AA, Lima HM, Peixoto ACA, Maia GC, Resende Junior PP, Martins LB, Silveira L: Use of ultrasound for gastric volume evaluation after ingestion of different volumes of isotonic solution. *Braz J Anesthesiol (English Edition)* 2017; 67:376–82
  169. Okabe T, Terashima H, Sakamoto A: What is the manner of gastric emptying after ingestion of liquids with differences in the volume under uniform glucose-based energy content? *Clin Nutr* 2017; 36:1283–7
  170. Gomes PC, Caporossi C, Aguiar-Nascimento JE, Silva AM, Araujo VM: Residual gastric volume evaluation with ultrasonography after ingestion of carbohydrate- or carbohydrate plus glutamine-enriched beverages: A randomized, crossover clinical trial with healthy volunteers. *Arq Gastroenterol* 2017; 54:33–6
  171. Bisinotto FMB, Silveira L, Rossi TC, Martins LB, Zago GP, Mendonca MAL: Comparative ultrasound study of gastric emptying between an isotonic solution and a nutritional supplement. *Braz J Anesthesiol (English Edition)* 2019; 69:115–21
  172. Jian WL, Zhang YL, Xu JM, Xia SY, Zeng H, Dai RP, Li H: Effects of a carbohydrate loading on gastric emptying and fasting discomfort: An ultrasonography study. *Int J Clin Exp Med* 2017; 10:788–94
  173. Nakamura M, Uchida K, Akahane M, Watanabe Y, Ohtomo K, Yamada Y: The effects on gastric emptying and carbohydrate loading of an oral nutritional supplement and an oral rehydration solution: A crossover study with magnetic resonance imaging. *Anesth Analg* 2014; 118:1268–73
  174. Awad S, Blackshaw PE, Wright JW, Macdonald IA, Perkins AC, Lobo DN: A randomized crossover study of the effects of glutamine and lipid on the gastric emptying time of a preoperative carbohydrate drink. *Clin Nutr* 2011; 30:165–71
  175. Lobo DN, Hendry PO, Rodrigues G, Marciani L, Totman JJ, Wright JW, Preston T, Gowland P, Spiller RC, Fearon KC: Gastric emptying of three liquid oral preoperative metabolic preconditioning regimens measured by magnetic resonance imaging in healthy adult volunteers: A randomised double-blind, crossover study. *Clin Nutr* 2009; 28:636–41
  176. Brianez LR, Caporossi C, de Moura YW, Dias LA, Leal RV, de Aguiar-Nascimento JE: Gastric residual volume by magnetic resonance after intake of maltodextrin and glutamine: A randomized double-blind, crossover study. *Arq Gastroenterol* 2014; 51:123–7
  177. Shiraishi T, Kurosaki D, Nakamura M, Yazaki T, Kobinata S, Seki Y, Kasama K, Taniguchi H: Gastric

- fluid volume change after oral rehydration solution intake in morbidly obese and normal controls: A magnetic resonance imaging-based analysis. *Anesth Analg* 2017; 124:1174–8
178. Gustafsson UO, Nygren J, Thorell A, Soop M, Hellstrom PM, Ljungqvist O, Hagstrom-Toft E: Pre-operative carbohydrate loading may be used in type 2 diabetes patients. *Acta Anaesthesiol Scand* 2008; 52:946–51
  179. Jabbari Moghaddam Y, Seyedhejazi M, Naderpour M, Yaghooblu Y, Golzari SE: Is fasting duration important in post adenotonsillectomy feeding time? *Anesth Pain Med* 2014; 4:e10256
  180. Moyao-Garcia D, Corrales-Fernandez MA, Blanco-Rodriguez G, Sanchez-Hernandez E, Nava-Ocampo AA: Benefits of oral administration of an electrolyte solution interrupting a prolonged preoperative fasting period in pediatric patients. *J Pediatr Surg* 2001; 36:457–9
  181. Castillo-Zamora C, Castillo-Peralta LA, Nava-Ocampo AA: Randomized trial comparing overnight preoperative fasting period *vs.* oral administration of apple juice at 06:00–06:30 am in pediatric orthopedic surgical patients. *Paediatr Anaesth* 2005; 15:638–42
  182. Tudor-Drobjewski BA, Marhofer P, Kimberger O, Huber WD, Roth G, Triffiterer L: Randomised controlled trial comparing preoperative carbohydrate loading with standard fasting in paediatric anaesthesia. *Br J Anaesth* 2018; 121:656–61
  183. Gawecka A, Mierzevska-Schmidt M: Tolerance of, and metabolic effects of, preoperative oral carbohydrate administration in children—A preliminary report. *Anaesthesiol Intensive Ther* 2014; 46:61–4
  184. Wang H, Zou Y, Xie H, Chen Y, Fu Q, Chen Y: The effect of a new preoperative fasting regime on the subjective perception, postoperative recovery, postoperative complications, and satisfaction in pediatric patients. *Int J Clin Exp Med* 2020; 13:9585–92
  185. Jiang W, Liu X, Liu F, Huang S, Yuan J, Shi Y, Chen H, Zhang J, Lu C, Li W, Geng Q, Xu X, Tang W: Safety and benefit of pre-operative oral carbohydrate in infants: A multi-center study in China. *Asia Pac J Clin Nutr* 2018; 27:975–9
  186. Song IK, Kim HJ, Lee JH, Kim EH, Kim JT, Kim HS: Ultrasound assessment of gastric volume in children after drinking carbohydrate-containing fluids. *Br J Anaesth* 2016; 116:513–7
  187. Schoenfelder RC, Ponnammam CM, Freyle D, Wang SM, Kain ZN: Residual gastric fluid volume and chewing gum before surgery. *Anesth Analg* 2006; 102:415–7
  188. Valencia JA, Cubillos J, Romero D, Amaya W, Moreno J, Ferrer L, Pabon S, Perlas A: Chewing gum for 1 h does not change gastric volume in healthy fasting subjects: A prospective observational study. *J Clin Anesth* 2019; 56:100–5
  189. Shanmugam S, Goulding G, Gibbs NM, Taraporewalla K, Culwick M: Chewing gum in the preoperative fasting period: An analysis of de-identified incidents reported to webairs. *Anaesth Intensive Care* 2016; 44:281–4
